# Supplementary material for: Assessment of the electron donor properties of substituted phenanthroline ligands in molybdenum carbonyl complexes using molecular electrostatic potentials
Source: Royal Society of Chemistry journal article supplement (doi:10.1039/c7nj04592a), 2018-01-01
Supplement: c7nj04592a1.xlsx [file c7nj04592a1.xlsx]

## Sheet: Sheet1
S.No.	substituent	ΔVC	Randomly generated numbers				Randomly generated ΔVC values				ΔVC	Eint	ΔVN-pred
1	COCl	19.1	15	28	11	30	9.3	1	11.7	0.2	22.2	-54.9373	12.2522		thirteen phenanthrolines reported by Brenna et.al.
2	CN	18	8	41	24	32	13.8	-3.7	3.6	-0.9	12.8	-56.6237	7.06432		ΔVC	Eint
3	SO2Me	16.8	34	13	36	26	-1.4	10	-2	2.5	9.1	-57.2875	5.02229		0	-58.9
4	cyclo-C4F7	16.1	20	31	8	38	6.4	-0.5	13.8	-2.6	17.1	-55.8523	9.43749		21.2	-56.2
5	C(Et)(NO2)2	15.4	9	12	1	43	13.4	10.9	19.1	-4	39.4	-51.8516	21.7449		-9	-59.7
6	CF2CF3	14.7	33	20	18	46	-1.2	6.4	7.6	-5.9	6.9	-57.6821	3.80811		0.4	-60.2
7	OCN	14.2	8	5	6	29	13.8	15.4	14.7	0.7	44.6	-50.9188	24.6147		-6.6	-60.2
8	CHO	13.8	2	11	2	35	18	11.7	18	-1.8	45.9	-50.6855	25.3322		-13.2	-61
9	ONO2	13.4	18	33	44	19	7.6	-1.2	-4.8	7	8.6	-57.3772	4.74634		-6.6	-59.9
10	OCOCF3	12.2	2	27	18	17	18	1.5	7.6	8.2	35.3	-52.5872	19.4821		-3.3	-59.3
11	N(Me)NO2	11.7	32	32	11	8	-0.9	-0.9	11.7	13.8	23.7	-54.6682	13.08		7	-57.7
12	COOH	10.9	32	3	38	32	-0.9	16.8	-2.6	-0.9	12.4	-56.6954	6.84356		7.6	-57.7
13	COOC6H5	10	29	10	49	29	0.7	12.2	-11.2	0.7	2.4	-58.4894	1.32456		14	-56.9
14	COMe	9.7	47	11	20	22	-6.5	11.7	6.4	4.8	16.4	-55.9778	9.05116		15.2	-55
15	CONHC6H5	9.3	16	4	38	18	8.9	16.1	-2.6	7.6	30	-53.538	16.557		30.4	-52.6
16	COEt	8.9	16	19	12	2	8.9	7	10.9	18	44.8	-50.8829	24.7251
17	COOMe	8.2	34	41	26	7	-1.4	-3.7	2.5	14.2	11.6	-56.839	6.40204
18	Br	7.6	20	49	46	8	6.4	-11.2	-5.9	13.8	3.1	-58.3639	1.71089
19	C(NO2)Me2	7	4	13	16	46	16.1	10	8.9	-5.9	29.1	-53.6995	16.0603
20	CONHMe	6.4	30	47	10	41	0.2	-6.5	12.2	-3.7	2.2	-58.5253	1.21418
21	C=CH	5.7	45	24	38	39	-5	3.6	-2.6	-3.1	-7.1	-60.1937	-3.91849
22	SiClMe2	4.8	16	40	43	29	8.9	-3.3	-4	0.7	2.3	-58.5074	1.26937
23	SCH =CH2	4.1	37	26	31	20	-2.4	2.5	-0.5	6.4	6	-57.8436	3.3114
24	C6H4-3Cl	3.6	17	39	17	7	8.2	-3.1	8.2	14.2	27.5	-53.9865	15.1772
25	NHCSMe	3.1	50	34	41	42	-12.3	-1.4	-3.7	-3.8	-21.2	-62.7233	-11.7003
26	CH2NHCOMe	2.5	32	21	3	47	-0.9	5.7	16.8	-6.5	15.1	-56.2111	8.33369
27	OCOMe	1.5	10	25	3	8	12.2	3.1	16.8	13.8	45.9	-50.6855	25.3322
28	CH=CH2	1	28	1	15	34	1	19.1	9.3	-1.4	28	-53.8968	15.4532
29	OCH=CH2	0.7	14	3	10	12	9.7	16.8	12.2	10.9	49.6	-50.0218	27.3742
30	C6H5	0.2	34	39	13	34	-1.4	-3.1	10	-1.4	4.1	-58.1845	2.26279
31	C(Me)=CH2	-0.5	25	8	28	24	3.1	13.8	1	3.6	21.5	-55.0629	11.8659
32	SiMe3	-0.9	6	35	5	44	14.7	-1.8	15.4	-4.8	23.5	-54.7041	12.9696
33	C6H4-4Me	-1.2	28	45	29	15	1	-5	0.7	9.3	6	-57.8436	3.3114
34	NHCOMe	-1.4	6	22	10	19	14.7	4.8	12.2	7	38.7	-51.9772	21.3585
35	CH2C6H5	-1.8	49	43	37	45	-11.2	-4	-2.4	-5	-22.6	-62.9744	-12.4729
36	OH	-2	22	12	28	27	4.8	10.9	1	1.5	18.2	-55.6549	10.0446
37	cyclopropyl	-2.4	41	42	34	25	-3.7	-3.8	-1.4	3.1	-5.8	-59.9605	-3.20102
38	CH2NMe2	-2.6	40	5	43	41	-3.3	15.4	-4	-3.7	4.4	-58.1306	2.42836
39	CH2CH2CH3	-3.1	3	38	28	5	16.8	-2.6	1	15.4	30.6	-53.4304	16.8881
40	Me	-3.3	17	36	26	48	8.2	-2	2.5	-9	-0.3	-58.9738	-0.16557
41	NHCONH2	-3.7	48	8	17	41	-9	13.8	8.2	-3.7	9.3	-57.2516	5.13267
42	cyclohexyl	-3.8	15	4	33	25	9.3	16.1	-1.2	3.1	27.3	-54.0224	15.0669
43	Et	-4	14	15	17	3	9.7	9.3	8.2	16.8	44	-51.0264	24.2836
44	NHC6H5	-4.8	35	8	48	44	-1.8	13.8	-9	-4.8	-1.8	-59.2429	-0.99342
45	OMe	-5	41	7	30	24	-3.7	14.2	0.2	3.6	14.3	-56.3546	7.89217
46	O(CH2)3CH3	-5.9	24	20	11	40	3.6	6.4	11.7	-3.3	18.4	-55.619	10.155
47	OCHMe2	-6.5	40	6	40	36	-3.3	14.7	-3.3	-2	6.1	-57.8257	3.36659
48	NH2	-9	23	15	46	21	4.1	9.3	-5.9	5.7	13.2	-56.5519	7.28508
49	NHNH2	-11.2	17	8	49	17	8.2	13.8	-11.2	8.2	19	-55.5114	10.4861
50	NMe2	-12.3	42	43	37	20	-3.8	-4	-2.4	6.4	-3.8	-59.6017	-2.09722
			18	20	12	4	7.6	6.4	10.9	16.1	41	-51.5646	22.6279
			37	42	17	43	-2.4	-3.8	8.2	-4	-2	-59.2788	-1.1038
			27	31	1	25	1.5	-0.5	19.1	3.1	23.2	-54.7579	12.8041
			35	15	42	31	-1.8	9.3	-3.8	-0.5	3.2	-58.3459	1.76608
			33	48	7	14	-1.2	-9	14.2	9.7	13.7	-56.4622	7.56103
			50	16	43	14	-12.3	8.9	-4	9.7	2.3	-58.5074	1.26937
			15	9	22	32	9.3	13.4	4.8	-0.9	26.6	-54.148	14.6805
			30	3	35	18	0.2	16.8	-1.8	7.6	22.8	-54.8297	12.5833
			22	41	50	27	4.8	-3.7	-12.3	1.5	-9.7	-60.6602	-5.35343
			12	41	42	34	10.9	-3.7	-3.8	-1.4	2	-58.5612	1.1038
			11	25	31	3	11.7	3.1	-0.5	16.8	31.1	-53.3407	17.1641
			5	22	19	4	15.4	4.8	7	16.1	43.3	-51.152	23.8973
			31	19	37	22	-0.5	7	-2.4	4.8	8.9	-57.3233	4.91191
			4	25	1	8	16.1	3.1	19.1	13.8	52.1	-49.5733	28.754
			36	35	3	21	-2	-1.8	16.8	5.7	18.7	-55.5652	10.3205
			44	19	32	26	-4.8	7	-0.9	2.5	3.8	-58.2383	2.09722
			30	6	33	13	0.2	14.7	-1.2	10	23.7	-54.6682	13.08
			23	28	19	26	4.1	1	7	2.5	14.6	-56.3008	8.05774
			2	46	29	4	18	-5.9	0.7	16.1	28.9	-53.7353	15.9499
			23	19	23	19	4.1	7	4.1	7	22.2	-54.9373	12.2522
			17	4	6	8	8.2	16.1	14.7	13.8	52.8	-49.4477	29.1403
			13	15	26	12	10	9.3	2.5	10.9	32.7	-53.0536	18.0471
			11	18	32	19	11.7	7.6	-0.9	7	25.4	-54.3632	14.0183
			24	2	44	42	3.6	18	-4.8	-3.8	13	-56.5878	7.1747
			43	20	20	23	-4	6.4	6.4	4.1	12.9	-56.6057	7.11951
			3	34	10	43	16.8	-1.4	12.2	-4	23.6	-54.6862	13.0248
			20	4	25	15	6.4	16.1	3.1	9.3	34.9	-52.6589	19.2613
			10	21	22	35	12.2	5.7	4.8	-1.8	20.9	-55.1705	11.5347
			39	19	33	47	-3.1	7	-1.2	-6.5	-3.8	-59.6017	-2.09722
			5	15	7	9	15.4	9.3	14.2	13.4	52.3	-49.5374	28.8644
			37	26	8	28	-2.4	2.5	13.8	1	14.9	-56.2469	8.22331
			23	5	2	41	4.1	15.4	18	-3.7	33.8	-52.8563	18.6542
			27	11	6	45	1.5	11.7	14.7	-5	22.9	-54.8117	12.6385
			20	11	6	19	6.4	11.7	14.7	7	39.8	-51.7799	21.9656
			23	49	5	36	4.1	-11.2	15.4	-2	6.3	-57.7898	3.47697
			24	4	22	29	3.6	16.1	4.8	0.7	25.2	-54.3991	13.9079
			45	10	36	46	-5	12.2	-2	-5.9	-0.7	-59.0456	-0.38633
			7	43	11	5	14.2	-4	11.7	15.4	37.3	-52.2284	20.5859
			49	10	38	48	-11.2	12.2	-2.6	-9	-10.6	-60.8216	-5.85014
			19	31	17	40	7	-0.5	8.2	-3.3	11.4	-56.8748	6.29166
			7	3	46	33	14.2	16.8	-5.9	-1.2	23.9	-54.6323	13.1904
			11	12	3	2	11.7	10.9	16.8	18	57.4	-48.6224	31.6791
			9	15	16	31	13.4	9.3	8.9	-0.5	31.1	-53.3407	17.1641
			32	25	27	14	-0.9	3.1	1.5	9.7	13.4	-56.516	7.39546
			50	13	29	4	-12.3	10	0.7	16.1	14.5	-56.3187	8.00255
			38	6	20	41	-2.6	14.7	6.4	-3.7	14.8	-56.2649	8.16812
			25	27	35	45	3.1	1.5	-1.8	-5	-2.2	-59.3147	-1.21418
			16	27	22	19	8.9	1.5	4.8	7	22.2	-54.9373	12.2522
			47	20	45	45	-6.5	6.4	-5	-5	-10.1	-60.7319	-5.57419
			16	8	24	49	8.9	13.8	3.6	-11.2	15.1	-56.2111	8.33369
			36	13	46	8	-2	10	-5.9	13.8	15.9	-56.0675	8.77521
			37	5	4	17	-2.4	15.4	16.1	8.2	37.3	-52.2284	20.5859
			3	15	40	25	16.8	9.3	-3.3	3.1	25.9	-54.2735	14.2942
			37	40	25	17	-2.4	-3.3	3.1	8.2	5.6	-57.9154	3.09064
			38	28	13	9	-2.6	1	10	13.4	21.8	-55.0091	12.0314
			32	37	17	39	-0.9	-2.4	8.2	-3.1	1.8	-58.5971	0.99342
			27	38	32	22	1.5	-2.6	-0.9	4.8	2.8	-58.4177	1.54532
			33	27	22	29	-1.2	1.5	4.8	0.7	5.8	-57.8795	3.20102
			20	48	16	32	6.4	-9	8.9	-0.9	5.4	-57.9512	2.98026
			17	10	1	9	8.2	12.2	19.1	13.4	52.9	-49.4297	29.1955
			25	38	4	18	3.1	-2.6	16.1	7.6	24.2	-54.5785	13.356
			11	21	9	19	11.7	5.7	13.4	7	37.8	-52.1387	20.8618
			18	49	20	22	7.6	-11.2	6.4	4.8	7.6	-57.5566	4.19444
			22	31	44	45	4.8	-0.5	-4.8	-5	-5.5	-59.9067	-3.03545
			34	10	11	37	-1.4	12.2	11.7	-2.4	20.1	-55.3141	11.0932
			39	7	39	34	-3.1	14.2	-3.1	-1.4	6.6	-57.736	3.64254
			37	41	14	26	-2.4	-3.7	9.7	2.5	6.1	-57.8257	3.36659
			18	30	41	21	7.6	0.2	-3.7	5.7	9.8	-57.1619	5.40862
			6	36	31	3	14.7	-2	-0.5	16.8	29	-53.7174	16.0051
			39	7	21	36	-3.1	14.2	5.7	-2	14.8	-56.2649	8.16812
			16	34	19	16	8.9	-1.4	7	8.9	23.4	-54.722	12.9145
			37	24	46	41	-2.4	3.6	-5.9	-3.7	-8.4	-60.427	-4.63596
			11	38	1	24	11.7	-2.6	19.1	3.6	31.8	-53.2151	17.5504
			50	31	1	36	-12.3	-0.5	19.1	-2	4.3	-58.1486	2.37317
			12	48	22	42	10.9	-9	4.8	-3.8	2.9	-58.3997	1.60051
			25	43	41	35	3.1	-4	-3.7	-1.8	-6.4	-60.0682	-3.53216
			9	23	22	12	13.4	4.1	4.8	10.9	33.2	-52.9639	18.3231
			11	30	37	16	11.7	0.2	-2.4	8.9	18.4	-55.619	10.155
			46	1	46	39	-5.9	19.1	-5.9	-3.1	4.2	-58.1665	2.31798
			2	35	48	13	18	-1.8	-9	10	17.2	-55.8343	9.49268
			40	22	28	48	-3.3	4.8	1	-9	-6.5	-60.0861	-3.58735
			48	9	35	6	-9	13.4	-1.8	14.7	17.3	-55.8164	9.54787
			13	41	24	27	10	-3.7	3.6	1.5	11.4	-56.8748	6.29166
			17	26	1	13	8.2	2.5	19.1	10	39.8	-51.7799	21.9656
			4	17	21	42	16.1	8.2	5.7	-3.8	26.2	-54.2197	14.4598
			49	13	50	32	-11.2	10	-12.3	-0.9	-14.4	-61.5034	-7.94736
			28	17	19	8	1	8.2	7	13.8	30	-53.538	16.557
			34	13	47	9	-1.4	10	-6.5	13.4	15.5	-56.1393	8.55445
			33	4	19	48	-1.2	16.1	7	-9	12.9	-56.6057	7.11951
			45	50	5	34	-5	-12.3	15.4	-1.4	-3.3	-59.512	-1.82127
			44	35	34	22	-4.8	-1.8	-1.4	4.8	-3.2	-59.4941	-1.76608
			18	12	3	27	7.6	10.9	16.8	1.5	36.8	-52.3181	20.3099
			30	41	13	20	0.2	-3.7	10	6.4	12.9	-56.6057	7.11951
			36	30	32	13	-2	0.2	-0.9	10	7.3	-57.6104	4.02887
			17	3	22	42	8.2	16.8	4.8	-3.8	26	-54.2556	14.3494
			34	24	21	42	-1.4	3.6	5.7	-3.8	4.1	-58.1845	2.26279
			20	13	26	22	6.4	10	2.5	4.8	23.7	-54.6682	13.08
			1	47	25	46	19.1	-6.5	3.1	-5.9	9.8	-57.1619	5.40862
			20	50	20	23	6.4	-12.3	6.4	4.1	4.6	-58.0948	2.53874
			12	19	36	6	10.9	7	-2	14.7	30.6	-53.4304	16.8881
			32	15	36	41	-0.9	9.3	-2	-3.7	2.7	-58.4356	1.49013
			22	22	15	40	4.8	4.8	9.3	-3.3	15.6	-56.1214	8.60964
			30	29	1	5	0.2	0.7	19.1	15.4	35.4	-52.5692	19.5373
			8	25	30	29	13.8	3.1	0.2	0.7	17.8	-55.7267	9.82382
			44	5	33	2	-4.8	15.4	-1.2	18	27.4	-54.0044	15.1221
			50	48	50	49	-12.3	-9	-12.3	-11.2	-44.8	-66.9571	-24.7251
			9	37	27	32	13.4	-2.4	1.5	-0.9	11.6	-56.839	6.40204
			18	32	23	9	7.6	-0.9	4.1	13.4	24.2	-54.5785	13.356
			25	48	5	30	3.1	-9	15.4	0.2	9.7	-57.1798	5.35343
			1	18	42	12	19.1	7.6	-3.8	10.9	33.8	-52.8563	18.6542
			18	38	33	50	7.6	-2.6	-1.2	-12.3	-8.5	-60.4449	-4.69115
			39	25	40	37	-3.1	3.1	-3.3	-2.4	-5.7	-59.9426	-3.14583
			14	49	7	13	9.7	-11.2	14.2	10	22.7	-54.8476	12.5281
			28	16	4	30	1	8.9	16.1	0.2	26.2	-54.2197	14.4598
			48	17	50	9	-9	8.2	-12.3	13.4	0.3	-58.8662	0.16557
			45	16	36	5	-5	8.9	-2	15.4	17.3	-55.8164	9.54787
			48	21	43	38	-9	5.7	-4	-2.6	-9.9	-60.6961	-5.46381
			8	23	21	33	13.8	4.1	5.7	-1.2	22.4	-54.9014	12.3626
			30	40	10	6	0.2	-3.3	12.2	14.7	23.8	-54.6503	13.1352
			30	4	42	35	0.2	16.1	-3.8	-1.8	10.7	-57.0004	5.90533
			13	12	50	32	10	10.9	-12.3	-0.9	7.7	-57.5386	4.24963
			5	1	31	1	15.4	19.1	-0.5	19.1	53.1	-49.3939	29.3059
			14	44	10	29	9.7	-4.8	12.2	0.7	17.8	-55.7267	9.82382
			13	11	6	41	10	11.7	14.7	-3.7	32.7	-53.0536	18.0471
			50	48	9	15	-12.3	-9	13.4	9.3	1.4	-58.6688	0.77266
			44	30	4	26	-4.8	0.2	16.1	2.5	14	-56.4084	7.7266
			22	3	49	9	4.8	16.8	-11.2	13.4	23.8	-54.6503	13.1352
			36	43	30	47	-2	-4	0.2	-6.5	-12.3	-61.1266	-6.78837
			29	7	50	50	0.7	14.2	-12.3	-12.3	-9.7	-60.6602	-5.35343
			36	43	37	40	-2	-4	-2.4	-3.3	-11.7	-61.019	-6.45723
			27	46	33	12	1.5	-5.9	-1.2	10.9	5.3	-57.9692	2.92507
			50	25	26	28	-12.3	3.1	2.5	1	-5.7	-59.9426	-3.14583
			45	35	31	49	-5	-1.8	-0.5	-11.2	-18.5	-62.2389	-10.2101
			14	42	11	42	9.7	-3.8	11.7	-3.8	13.8	-56.4443	7.61622
			1	46	49	30	19.1	-5.9	-11.2	0.2	2.2	-58.5253	1.21418
			34	17	22	21	-1.4	8.2	4.8	5.7	17.3	-55.8164	9.54787
			18	7	18	28	7.6	14.2	7.6	1	30.4	-53.4662	16.7778
			13	1	31	29	10	19.1	-0.5	0.7	29.3	-53.6636	16.1707
			41	46	47	39	-3.7	-5.9	-6.5	-3.1	-19.2	-62.3645	-10.5965
			17	19	44	50	8.2	7	-4.8	-12.3	-1.9	-59.2609	-1.04861
			22	22	6	26	4.8	4.8	14.7	2.5	26.8	-54.1121	14.7909
			4	27	29	5	16.1	1.5	0.7	15.4	33.7	-52.8742	18.599
			39	43	3	12	-3.1	-4	16.8	10.9	20.6	-55.2244	11.3691
			6	28	39	37	14.7	1	-3.1	-2.4	10.2	-57.0901	5.62938
			4	19	12	29	16.1	7	10.9	0.7	34.7	-52.6948	19.1509
			11	41	35	42	11.7	-3.7	-1.8	-3.8	2.4	-58.4894	1.32456
			25	12	7	33	3.1	10.9	14.2	-1.2	27	-54.0762	14.9013
			8	36	15	7	13.8	-2	9.3	14.2	35.3	-52.5872	19.4821
			8	22	13	50	13.8	4.8	10	-12.3	16.3	-55.9958	8.99597
			22	18	46	41	4.8	7.6	-5.9	-3.7	2.8	-58.4177	1.54532
			20	47	37	4	6.4	-6.5	-2.4	16.1	13.6	-56.4802	7.50584
			11	24	47	38	11.7	3.6	-6.5	-2.6	6.2	-57.8077	3.42178
			5	44	6	34	15.4	-4.8	14.7	-1.4	23.9	-54.6323	13.1904
			2	35	39	28	18	-1.8	-3.1	1	14.1	-56.3905	7.78179
			25	41	38	6	3.1	-3.7	-2.6	14.7	11.5	-56.8569	6.34685
			49	5	43	3	-11.2	15.4	-4	16.8	17	-55.8702	9.3823
			3	44	50	34	16.8	-4.8	-12.3	-1.4	-1.7	-59.225	-0.93823
			35	33	18	17	-1.8	-1.2	7.6	8.2	12.8	-56.6237	7.06432
			44	26	4	47	-4.8	2.5	16.1	-6.5	7.3	-57.6104	4.02887
			6	16	14	7	14.7	8.9	9.7	14.2	47.5	-50.3985	26.2152
			35	43	25	7	-1.8	-4	3.1	14.2	11.5	-56.8569	6.34685
			12	22	36	47	10.9	4.8	-2	-6.5	7.2	-57.6283	3.97368
			50	47	13	4	-12.3	-6.5	10	16.1	7.3	-57.6104	4.02887
			49	34	8	50	-11.2	-1.4	13.8	-12.3	-11.1	-60.9113	-6.12609
			28	6	45	48	1	14.7	-5	-9	1.7	-58.615	0.93823
			32	3	37	18	-0.9	16.8	-2.4	7.6	21.1	-55.1347	11.6451
			20	25	33	22	6.4	3.1	-1.2	4.8	13.1	-56.5699	7.22989
			26	37	34	21	2.5	-2.4	-1.4	5.7	4.4	-58.1306	2.42836
			30	31	2	9	0.2	-0.5	18	13.4	31.1	-53.3407	17.1641
			38	44	27	7	-2.6	-4.8	1.5	14.2	8.3	-57.431	4.58077
			8	16	11	44	13.8	8.9	11.7	-4.8	29.6	-53.6098	16.3362
			29	40	40	32	0.7	-3.3	-3.3	-0.9	-6.8	-60.1399	-3.75292
			50	28	10	23	-12.3	1	12.2	4.1	5	-58.023	2.7595
			24	16	19	31	3.6	8.9	7	-0.5	19	-55.5114	10.4861
			42	29	37	10	-3.8	0.7	-2.4	12.2	6.7	-57.718	3.69773
			28	18	1	19	1	7.6	19.1	7	34.7	-52.6948	19.1509
			45	14	46	4	-5	9.7	-5.9	16.1	14.9	-56.2469	8.22331
			4	45	6	40	16.1	-5	14.7	-3.3	22.5	-54.8835	12.4177
			41	39	25	13	-3.7	-3.1	3.1	10	6.3	-57.7898	3.47697
			45	5	39	48	-5	15.4	-3.1	-9	-1.7	-59.225	-0.93823
			24	12	4	47	3.6	10.9	16.1	-6.5	24.1	-54.5965	13.3008
			28	29	29	11	1	0.7	0.7	11.7	14.1	-56.3905	7.78179
			20	38	49	14	6.4	-2.6	-11.2	9.7	2.3	-58.5074	1.26937
			50	13	46	12	-12.3	10	-5.9	10.9	2.7	-58.4356	1.49013
			2	26	5	12	18	2.5	15.4	10.9	46.8	-50.5241	25.8289
			6	8	6	34	14.7	13.8	14.7	-1.4	41.8	-51.4211	23.0694
			6	37	2	6	14.7	-2.4	18	14.7	45	-50.847	24.8355
			4	2	4	41	16.1	18	16.1	-3.7	46.5	-50.5779	25.6633
			42	38	28	7	-3.8	-2.6	1	14.2	8.8	-57.3413	4.85672
			45	27	9	25	-5	1.5	13.4	3.1	13	-56.5878	7.1747
			6	5	34	42	14.7	15.4	-1.4	-3.8	24.9	-54.4529	13.7423
			47	32	18	42	-6.5	-0.9	7.6	-3.8	-3.6	-59.5658	-1.98684
			43	18	39	18	-4	7.6	-3.1	7.6	8.1	-57.4669	4.47039
			3	38	22	29	16.8	-2.6	4.8	0.7	19.7	-55.3858	10.8724
			9	1	47	5	13.4	19.1	-6.5	15.4	41.4	-51.4928	22.8487
			28	8	18	42	1	13.8	7.6	-3.8	18.6	-55.5832	10.2653
			40	1	16	23	-3.3	19.1	8.9	4.1	28.8	-53.7533	15.8947
			6	20	21	4	14.7	6.4	5.7	16.1	42.9	-51.2237	23.6765
			18	48	27	21	7.6	-9	1.5	5.7	5.8	-57.8795	3.20102
			45	30	50	9	-5	0.2	-12.3	13.4	-3.7	-59.5838	-2.04203
			13	29	16	38	10	0.7	8.9	-2.6	17	-55.8702	9.3823
			9	15	45	43	13.4	9.3	-5	-4	13.7	-56.4622	7.56103
			35	38	40	27	-1.8	-2.6	-3.3	1.5	-6.2	-60.0323	-3.42178
			16	13	15	15	8.9	10	9.3	9.3	37.5	-52.1925	20.6962
			48	19	41	46	-9	7	-3.7	-5.9	-11.6	-61.001	-6.40204
			20	35	18	24	6.4	-1.8	7.6	3.6	15.8	-56.0855	8.72002
			49	14	10	26	-11.2	9.7	12.2	2.5	13.2	-56.5519	7.28508
			16	39	16	31	8.9	-3.1	8.9	-0.5	14.2	-56.3725	7.83698
			22	44	39	28	4.8	-4.8	-3.1	1	-2.1	-59.2967	-1.15899
			13	14	29	2	10	9.7	0.7	18	38.4	-52.031	21.193
			32	7	3	48	-0.9	14.2	16.8	-9	21.1	-55.1347	11.6451
			2	11	3	2	18	11.7	16.8	18	64.5	-47.3487	35.5975
			17	27	19	12	8.2	1.5	7	10.9	27.6	-53.9686	15.2324
			47	23	12	27	-6.5	4.1	10.9	1.5	10	-57.126	5.519
			27	35	17	13	1.5	-1.8	8.2	10	17.9	-55.7087	9.87901
			48	25	47	37	-9	3.1	-6.5	-2.4	-14.8	-61.5751	-8.16812
			4	9	11	18	16.1	13.4	11.7	7.6	48.8	-50.1653	26.9327
			9	40	3	49	13.4	-3.3	16.8	-11.2	15.7	-56.1034	8.66483
			35	9	21	5	-1.8	13.4	5.7	15.4	32.7	-53.0536	18.0471
			23	32	22	37	4.1	-0.9	4.8	-2.4	5.6	-57.9154	3.09064
			20	25	47	3	6.4	3.1	-6.5	16.8	19.8	-55.3679	10.9276
			37	35	16	15	-2.4	-1.8	8.9	9.3	14	-56.4084	7.7266
			27	45	12	15	1.5	-5	10.9	9.3	16.7	-55.924	9.21673
			36	19	28	9	-2	7	1	13.4	19.4	-55.4396	10.7069
			47	42	4	15	-6.5	-3.8	16.1	9.3	15.1	-56.2111	8.33369
			22	23	32	36	4.8	4.1	-0.9	-2	6	-57.8436	3.3114
			41	43	46	10	-3.7	-4	-5.9	12.2	-1.4	-59.1712	-0.77266
			1	42	46	25	19.1	-3.8	-5.9	3.1	12.5	-56.6775	6.89875
			36	19	48	18	-2	7	-9	7.6	3.6	-58.2742	1.98684
			15	20	12	46	9.3	6.4	10.9	-5.9	20.7	-55.2064	11.4243
			17	25	34	31	8.2	3.1	-1.4	-0.5	9.4	-57.2336	5.18786
			7	2	30	9	14.2	18	0.2	13.4	45.8	-50.7035	25.277
			44	39	38	47	-4.8	-3.1	-2.6	-6.5	-17	-61.9698	-9.3823
			48	49	29	43	-9	-11.2	0.7	-4	-23.5	-63.1359	-12.9696
			16	12	36	29	8.9	10.9	-2	0.7	18.5	-55.6011	10.2101
			13	40	39	6	10	-3.3	-3.1	14.7	18.3	-55.637	10.0998
			23	47	23	40	4.1	-6.5	4.1	-3.3	-1.6	-59.207	-0.88304
			19	7	50	50	7	14.2	-12.3	-12.3	-3.4	-59.53	-1.87646
			18	36	20	30	7.6	-2	6.4	0.2	12.2	-56.7313	6.73318
			5	26	3	28	15.4	2.5	16.8	1	35.7	-52.5154	19.7028
			7	29	32	46	14.2	0.7	-0.9	-5.9	8.1	-57.4669	4.47039
			42	31	24	42	-3.8	-0.5	3.6	-3.8	-4.5	-59.7273	-2.48355
			4	50	37	16	16.1	-12.3	-2.4	8.9	10.3	-57.0722	5.68457
			41	17	17	14	-3.7	8.2	8.2	9.7	22.4	-54.9014	12.3626
			6	6	20	25	14.7	14.7	6.4	3.1	38.9	-51.9413	21.4689
			5	41	28	43	15.4	-3.7	1	-4	8.7	-57.3592	4.80153
			18	1	27	17	7.6	19.1	1.5	8.2	36.4	-52.3898	20.0892
			18	46	35	3	7.6	-5.9	-1.8	16.8	16.7	-55.924	9.21673
			39	31	40	25	-3.1	-0.5	-3.3	3.1	-3.8	-59.6017	-2.09722
			18	38	15	44	7.6	-2.6	9.3	-4.8	9.5	-57.2157	5.24305
			16	25	22	4	8.9	3.1	4.8	16.1	32.9	-53.0177	18.1575
			29	29	36	26	0.7	0.7	-2	2.5	1.9	-58.5791	1.04861
			45	1	24	10	-5	19.1	3.6	12.2	29.9	-53.5559	16.5018
			11	23	22	1	11.7	4.1	4.8	19.1	39.7	-51.7978	21.9104
			20	13	7	49	6.4	10	14.2	-11.2	19.4	-55.4396	10.7069
			7	48	45	27	14.2	-9	-5	1.5	1.7	-58.615	0.93823
			36	5	8	25	-2	15.4	13.8	3.1	30.3	-53.4842	16.7226
			38	20	16	10	-2.6	6.4	8.9	12.2	24.9	-54.4529	13.7423
			19	44	21	27	7	-4.8	5.7	1.5	9.4	-57.2336	5.18786
			36	39	38	22	-2	-3.1	-2.6	4.8	-2.9	-59.4403	-1.60051
			38	6	1	18	-2.6	14.7	19.1	7.6	38.8	-51.9593	21.4137
			1	35	39	32	19.1	-1.8	-3.1	-0.9	13.3	-56.534	7.34027
			31	45	17	21	-0.5	-5	8.2	5.7	8.4	-57.413	4.63596
			5	47	31	21	15.4	-6.5	-0.5	5.7	14.1	-56.3905	7.78179
			39	16	42	37	-3.1	8.9	-3.8	-2.4	-0.4	-58.9918	-0.22076
			28	5	50	31	1	15.4	-12.3	-0.5	3.6	-58.2742	1.98684
			13	46	23	17	10	-5.9	4.1	8.2	16.4	-55.9778	9.05116
			28	46	32	37	1	-5.9	-0.9	-2.4	-8.2	-60.3911	-4.52558
			19	5	45	35	7	15.4	-5	-1.8	15.6	-56.1214	8.60964
			33	31	18	19	-1.2	-0.5	7.6	7	12.9	-56.6057	7.11951
			36	41	31	32	-2	-3.7	-0.5	-0.9	-7.1	-60.1937	-3.91849
			48	27	17	27	-9	1.5	8.2	1.5	2.2	-58.5253	1.21418
			6	46	19	33	14.7	-5.9	7	-1.2	14.6	-56.3008	8.05774
			12	8	32	35	10.9	13.8	-0.9	-1.8	22	-54.9732	12.1418
			10	4	44	35	12.2	16.1	-4.8	-1.8	21.7	-55.027	11.9762
			18	31	12	20	7.6	-0.5	10.9	6.4	24.4	-54.5426	13.4664
			50	12	5	45	-12.3	10.9	15.4	-5	9	-57.3054	4.9671
			42	12	41	26	-3.8	10.9	-3.7	2.5	5.9	-57.8615	3.25621
			26	48	23	5	2.5	-9	4.1	15.4	13	-56.5878	7.1747
			46	28	19	19	-5.9	1	7	7	9.1	-57.2875	5.02229
			31	43	13	38	-0.5	-4	10	-2.6	2.9	-58.3997	1.60051
			47	43	42	50	-6.5	-4	-3.8	-12.3	-26.6	-63.692	-14.6805
			14	39	17	22	9.7	-3.1	8.2	4.8	19.6	-55.4038	10.8172
			30	3	14	34	0.2	16.8	9.7	-1.4	25.3	-54.3812	13.9631
			36	43	10	8	-2	-4	12.2	13.8	20	-55.332	11.038
			49	44	16	49	-11.2	-4.8	8.9	-11.2	-18.3	-62.203	-10.0998
			37	22	23	21	-2.4	4.8	4.1	5.7	12.2	-56.7313	6.73318
			46	22	32	22	-5.9	4.8	-0.9	4.8	2.8	-58.4177	1.54532
			40	20	20	24	-3.3	6.4	6.4	3.6	13.1	-56.5699	7.22989
			42	6	36	49	-3.8	14.7	-2	-11.2	-2.3	-59.3326	-1.26937
			32	21	44	43	-0.9	5.7	-4.8	-4	-4	-59.6376	-2.2076
			3	21	38	38	16.8	5.7	-2.6	-2.6	17.3	-55.8164	9.54787
			11	41	46	17	11.7	-3.7	-5.9	8.2	10.3	-57.0722	5.68457
			8	27	21	44	13.8	1.5	5.7	-4.8	16.2	-56.0137	8.94078
			3	40	12	10	16.8	-3.3	10.9	12.2	36.6	-52.354	20.1995
			6	33	23	18	14.7	-1.2	4.1	7.6	25.2	-54.3991	13.9079
			26	6	34	29	2.5	14.7	-1.4	0.7	16.5	-55.9599	9.10635
			23	4	17	30	4.1	16.1	8.2	0.2	28.6	-53.7892	15.7843
			11	21	48	7	11.7	5.7	-9	14.2	22.6	-54.8656	12.4729
			15	35	19	38	9.3	-1.8	7	-2.6	11.9	-56.7851	6.56761
			49	34	31	24	-11.2	-1.4	-0.5	3.6	-9.5	-60.6243	-5.24305
			41	32	37	14	-3.7	-0.9	-2.4	9.7	2.7	-58.4356	1.49013
			6	21	14	49	14.7	5.7	9.7	-11.2	18.9	-55.5293	10.4309
			49	46	4	32	-11.2	-5.9	16.1	-0.9	-1.9	-59.2609	-1.04861
			2	14	16	45	18	9.7	8.9	-5	31.6	-53.251	17.44
			49	24	31	36	-11.2	3.6	-0.5	-2	-10.1	-60.7319	-5.57419
			9	34	22	38	13.4	-1.4	4.8	-2.6	14.2	-56.3725	7.83698
			36	30	45	31	-2	0.2	-5	-0.5	-7.3	-60.2296	-4.02887
			12	4	49	31	10.9	16.1	-11.2	-0.5	15.3	-56.1752	8.44407
			47	35	3	45	-6.5	-1.8	16.8	-5	3.5	-58.2921	1.93165
			23	37	26	8	4.1	-2.4	2.5	13.8	18	-55.6908	9.9342
			6	15	39	28	14.7	9.3	-3.1	1	21.9	-54.9911	12.0866
			43	22	34	32	-4	4.8	-1.4	-0.9	-1.5	-59.1891	-0.82785
			2	2	34	12	18	18	-1.4	10.9	45.5	-50.7573	25.1114
			40	50	27	14	-3.3	-12.3	1.5	9.7	-4.4	-59.7094	-2.42836
			22	24	36	21	4.8	3.6	-2	5.7	12.1	-56.7493	6.67799
			20	20	13	29	6.4	6.4	10	0.7	23.5	-54.7041	12.9696
			50	46	18	45	-12.3	-5.9	7.6	-5	-15.6	-61.7186	-8.60964
			49	37	49	16	-11.2	-2.4	-11.2	8.9	-15.9	-61.7725	-8.77521
			31	42	23	38	-0.5	-3.8	4.1	-2.6	-2.8	-59.4223	-1.54532
			42	6	43	17	-3.8	14.7	-4	8.2	15.1	-56.2111	8.33369
			4	14	39	48	16.1	9.7	-3.1	-9	13.7	-56.4622	7.56103
			18	22	46	3	7.6	4.8	-5.9	16.8	23.3	-54.74	12.8593
			13	42	35	28	10	-3.8	-1.8	1	5.4	-57.9512	2.98026
			49	38	28	17	-11.2	-2.6	1	8.2	-4.6	-59.7452	-2.53874
			44	27	36	2	-4.8	1.5	-2	18	12.7	-56.6416	7.00913
			12	34	41	41	10.9	-1.4	-3.7	-3.7	2.1	-58.5433	1.15899
			41	39	1	24	-3.7	-3.1	19.1	3.6	15.9	-56.0675	8.77521
			41	6	10	13	-3.7	14.7	12.2	10	33.2	-52.9639	18.3231
			46	8	2	45	-5.9	13.8	18	-5	20.9	-55.1705	11.5347
			48	11	37	42	-9	11.7	-2.4	-3.8	-3.5	-59.5479	-1.93165
			17	32	7	31	8.2	-0.9	14.2	-0.5	21	-55.1526	11.5899
			40	34	2	23	-3.3	-1.4	18	4.1	17.4	-55.7984	9.60306
			48	49	2	34	-9	-11.2	18	-1.4	-3.6	-59.5658	-1.98684
			1	3	31	6	19.1	16.8	-0.5	14.7	50.1	-49.9321	27.6502
			20	37	41	27	6.4	-2.4	-3.7	1.5	1.8	-58.5971	0.99342
			33	41	30	45	-1.2	-3.7	0.2	-5	-9.7	-60.6602	-5.35343
			9	15	1	26	13.4	9.3	19.1	2.5	44.3	-50.9726	24.4492
			13	31	3	14	10	-0.5	16.8	9.7	36	-52.4616	19.8684
			22	3	6	41	4.8	16.8	14.7	-3.7	32.6	-53.0716	17.9919
			42	45	26	9	-3.8	-5	2.5	13.4	7.1	-57.6463	3.91849
			4	41	39	47	16.1	-3.7	-3.1	-6.5	2.8	-58.4177	1.54532
			19	33	27	42	7	-1.2	1.5	-3.8	3.5	-58.2921	1.93165
			17	47	25	49	8.2	-6.5	3.1	-11.2	-6.4	-60.0682	-3.53216
			12	45	10	13	10.9	-5	12.2	10	28.1	-53.8789	15.5084
			48	27	23	44	-9	1.5	4.1	-4.8	-8.2	-60.3911	-4.52558
			13	5	21	15	10	15.4	5.7	9.3	40.4	-51.6722	22.2968
			41	15	14	12	-3.7	9.3	9.7	10.9	26.2	-54.2197	14.4598
			12	6	14	29	10.9	14.7	9.7	0.7	36	-52.4616	19.8684
			29	13	4	9	0.7	10	16.1	13.4	40.2	-51.7081	22.1864
			28	35	11	4	1	-1.8	11.7	16.1	27	-54.0762	14.9013
			50	14	17	37	-12.3	9.7	8.2	-2.4	3.2	-58.3459	1.76608
			50	21	25	6	-12.3	5.7	3.1	14.7	11.2	-56.9107	6.18128
			13	31	22	43	10	-0.5	4.8	-4	10.3	-57.0722	5.68457
			47	18	41	12	-6.5	7.6	-3.7	10.9	8.3	-57.431	4.58077
			30	30	16	41	0.2	0.2	8.9	-3.7	5.6	-57.9154	3.09064
			22	43	40	25	4.8	-4	-3.3	3.1	0.6	-58.8124	0.33114
			33	31	36	43	-1.2	-0.5	-2	-4	-7.7	-60.3014	-4.24963
			1	22	29	18	19.1	4.8	0.7	7.6	32.2	-53.1433	17.7712
			47	43	20	18	-6.5	-4	6.4	7.6	3.5	-58.2921	1.93165
			16	39	32	1	8.9	-3.1	-0.9	19.1	24	-54.6144	13.2456
			8	35	17	42	13.8	-1.8	8.2	-3.8	16.4	-55.9778	9.05116
			17	50	49	9	8.2	-12.3	-11.2	13.4	-1.9	-59.2609	-1.04861
			13	5	6	47	10	15.4	14.7	-6.5	33.6	-52.8922	18.5438
			23	4	46	33	4.1	16.1	-5.9	-1.2	13.1	-56.5699	7.22989
			13	27	39	23	10	1.5	-3.1	4.1	12.5	-56.6775	6.89875
			39	21	44	47	-3.1	5.7	-4.8	-6.5	-8.7	-60.4808	-4.80153
			50	39	39	45	-12.3	-3.1	-3.1	-5	-23.5	-63.1359	-12.9696
			43	16	5	39	-4	8.9	15.4	-3.1	17.2	-55.8343	9.49268
			29	41	5	31	0.7	-3.7	15.4	-0.5	11.9	-56.7851	6.56761
			5	16	50	7	15.4	8.9	-12.3	14.2	26.2	-54.2197	14.4598
			20	21	46	46	6.4	5.7	-5.9	-5.9	0.3	-58.8662	0.16557
			15	28	10	1	9.3	1	12.2	19.1	41.6	-51.457	22.959
			38	6	27	36	-2.6	14.7	1.5	-2	11.6	-56.839	6.40204
			4	31	24	44	16.1	-0.5	3.6	-4.8	14.4	-56.3366	7.94736
			29	34	11	27	0.7	-1.4	11.7	1.5	12.5	-56.6775	6.89875
			46	18	33	41	-5.9	7.6	-1.2	-3.7	-3.2	-59.4941	-1.76608
			42	14	36	8	-3.8	9.7	-2	13.8	17.7	-55.7446	9.76863
			42	14	41	18	-3.8	9.7	-3.7	7.6	9.8	-57.1619	5.40862
			33	17	41	14	-1.2	8.2	-3.7	9.7	13	-56.5878	7.1747
			22	21	7	19	4.8	5.7	14.2	7	31.7	-53.233	17.4952
			32	44	5	3	-0.9	-4.8	15.4	16.8	26.5	-54.1659	14.6253
			18	41	48	34	7.6	-3.7	-9	-1.4	-6.5	-60.0861	-3.58735
			11	40	3	16	11.7	-3.3	16.8	8.9	34.1	-52.8025	18.8198
			34	24	34	27	-1.4	3.6	-1.4	1.5	2.3	-58.5074	1.26937
			49	7	6	4	-11.2	14.2	14.7	16.1	33.8	-52.8563	18.6542
			29	1	35	6	0.7	19.1	-1.8	14.7	32.7	-53.0536	18.0471
			9	1	2	25	13.4	19.1	18	3.1	53.6	-49.3042	29.5818
			26	25	48	7	2.5	3.1	-9	14.2	10.8	-56.9825	5.96052
			13	6	34	34	10	14.7	-1.4	-1.4	21.9	-54.9911	12.0866
			40	4	22	26	-3.3	16.1	4.8	2.5	20.1	-55.3141	11.0932
			3	17	1	37	16.8	8.2	19.1	-2.4	41.7	-51.439	23.0142
			25	24	2	25	3.1	3.6	18	3.1	27.8	-53.9327	15.3428
			38	41	3	22	-2.6	-3.7	16.8	4.8	15.3	-56.1752	8.44407
			3	10	39	9	16.8	12.2	-3.1	13.4	39.3	-51.8696	21.6897
			18	45	48	7	7.6	-5	-9	14.2	7.8	-57.5207	4.30482
			5	21	9	49	15.4	5.7	13.4	-11.2	23.3	-54.74	12.8593
			42	33	36	37	-3.8	-1.2	-2	-2.4	-9.4	-60.6064	-5.18786
			23	41	34	28	4.1	-3.7	-1.4	1	0	-58.92	0
			16	28	47	24	8.9	1	-6.5	3.6	7	-57.6642	3.8633
			21	25	48	9	5.7	3.1	-9	13.4	13.2	-56.5519	7.28508
			1	4	42	26	19.1	16.1	-3.8	2.5	33.9	-52.8383	18.7094
			30	18	24	50	0.2	7.6	3.6	-12.3	-0.9	-59.0815	-0.49671
			5	33	38	37	15.4	-1.2	-2.6	-2.4	9.2	-57.2695	5.07748
			17	15	28	43	8.2	9.3	1	-4	14.5	-56.3187	8.00255
			1	47	12	19	19.1	-6.5	10.9	7	30.5	-53.4483	16.8329
			18	45	31	50	7.6	-5	-0.5	-12.3	-10.2	-60.7499	-5.62938
			19	42	9	27	7	-3.8	13.4	1.5	18.1	-55.6729	9.98939
			41	6	49	22	-3.7	14.7	-11.2	4.8	4.6	-58.0948	2.53874
			4	35	44	50	16.1	-1.8	-4.8	-12.3	-2.8	-59.4223	-1.54532
			29	33	39	30	0.7	-1.2	-3.1	0.2	-3.4	-59.53	-1.87646
			20	12	47	8	6.4	10.9	-6.5	13.8	24.6	-54.5068	13.5767
			26	36	3	18	2.5	-2	16.8	7.6	24.9	-54.4529	13.7423
			5	25	33	42	15.4	3.1	-1.2	-3.8	13.5	-56.4981	7.45065
			9	19	47	39	13.4	7	-6.5	-3.1	10.8	-56.9825	5.96052
			27	6	41	45	1.5	14.7	-3.7	-5	7.5	-57.5745	4.13925
			19	47	46	9	7	-6.5	-5.9	13.4	8	-57.4848	4.4152
			18	14	22	28	7.6	9.7	4.8	1	23.1	-54.7759	12.7489
			22	28	7	17	4.8	1	14.2	8.2	28.2	-53.8609	15.5636
			6	28	33	39	14.7	1	-1.2	-3.1	11.4	-56.8748	6.29166
			3	5	47	45	16.8	15.4	-6.5	-5	20.7	-55.2064	11.4243
			43	4	24	49	-4	16.1	3.6	-11.2	4.5	-58.1127	2.48355
			42	15	9	2	-3.8	9.3	13.4	18	36.9	-52.3001	20.3651
			43	41	22	9	-4	-3.7	4.8	13.4	10.5	-57.0363	5.79495
			45	4	7	18	-5	16.1	14.2	7.6	32.9	-53.0177	18.1575
			18	49	2	36	7.6	-11.2	18	-2	12.4	-56.6954	6.84356
			8	24	24	23	13.8	3.6	3.6	4.1	25.1	-54.4171	13.8527
			12	42	35	15	10.9	-3.8	-1.8	9.3	14.6	-56.3008	8.05774
			32	39	8	23	-0.9	-3.1	13.8	4.1	13.9	-56.4263	7.67141
			30	14	48	26	0.2	9.7	-9	2.5	3.4	-58.31	1.87646
			41	17	46	2	-3.7	8.2	-5.9	18	16.6	-55.942	9.16154
			31	47	14	34	-0.5	-6.5	9.7	-1.4	1.3	-58.6868	0.71747
			11	30	17	31	11.7	0.2	8.2	-0.5	19.6	-55.4038	10.8172
			31	28	12	25	-0.5	1	10.9	3.1	14.5	-56.3187	8.00255
			37	42	10	44	-2.4	-3.8	12.2	-4.8	1.2	-58.7047	0.66228
			33	50	1	48	-1.2	-12.3	19.1	-9	-3.4	-59.53	-1.87646
			31	29	1	32	-0.5	0.7	19.1	-0.9	18.4	-55.619	10.155
			39	32	18	32	-3.1	-0.9	7.6	-0.9	2.7	-58.4356	1.49013
			48	34	44	44	-9	-1.4	-4.8	-4.8	-20	-62.508	-11.038
			47	1	20	43	-6.5	19.1	6.4	-4	15	-56.229	8.2785
			8	11	28	2	13.8	11.7	1	18	44.5	-50.9367	24.5595
			30	24	37	35	0.2	3.6	-2.4	-1.8	-0.4	-58.9918	-0.22076
			36	14	48	39	-2	9.7	-9	-3.1	-4.4	-59.7094	-2.42836
			27	26	13	48	1.5	2.5	10	-9	5	-58.023	2.7595
			36	32	48	5	-2	-0.9	-9	15.4	3.5	-58.2921	1.93165
			42	29	27	9	-3.8	0.7	1.5	13.4	11.8	-56.8031	6.51242
			36	5	19	10	-2	15.4	7	12.2	32.6	-53.0716	17.9919
			31	2	31	24	-0.5	18	-0.5	3.6	20.6	-55.2244	11.3691
			29	18	37	22	0.7	7.6	-2.4	4.8	10.7	-57.0004	5.90533
			47	46	5	14	-6.5	-5.9	15.4	9.7	12.7	-56.6416	7.00913
			31	13	40	26	-0.5	10	-3.3	2.5	8.7	-57.3592	4.80153
			45	4	32	39	-5	16.1	-0.9	-3.1	7.1	-57.6463	3.91849
			27	42	18	29	1.5	-3.8	7.6	0.7	6	-57.8436	3.3114
			32	13	21	7	-0.9	10	5.7	14.2	29	-53.7174	16.0051
			3	48	44	11	16.8	-9	-4.8	11.7	14.7	-56.2828	8.11293
			16	48	33	3	8.9	-9	-1.2	16.8	15.5	-56.1393	8.55445
			13	19	35	10	10	7	-1.8	12.2	27.4	-54.0044	15.1221
			34	49	34	34	-1.4	-11.2	-1.4	-1.4	-15.4	-61.6828	-8.49926
			25	49	13	37	3.1	-11.2	10	-2.4	-0.5	-59.0097	-0.27595
			44	11	38	15	-4.8	11.7	-2.6	9.3	13.6	-56.4802	7.50584
			36	35	44	22	-2	-1.8	-4.8	4.8	-3.8	-59.6017	-2.09722
			43	16	31	11	-4	8.9	-0.5	11.7	16.1	-56.0317	8.88559
			29	50	26	19	0.7	-12.3	2.5	7	-2.1	-59.2967	-1.15899
			27	9	16	16	1.5	13.4	8.9	8.9	32.7	-53.0536	18.0471
			34	42	26	20	-1.4	-3.8	2.5	6.4	3.7	-58.2562	2.04203
			36	7	39	24	-2	14.2	-3.1	3.6	12.7	-56.6416	7.00913
			25	23	9	47	3.1	4.1	13.4	-6.5	14.1	-56.3905	7.78179
			28	1	50	45	1	19.1	-12.3	-5	2.8	-58.4177	1.54532
			27	49	17	49	1.5	-11.2	8.2	-11.2	-12.7	-61.1984	-7.00913
			50	43	5	21	-12.3	-4	15.4	5.7	4.8	-58.0589	2.64912
			13	26	27	19	10	2.5	1.5	7	21	-55.1526	11.5899
			4	42	18	29	16.1	-3.8	7.6	0.7	20.6	-55.2244	11.3691
			47	31	38	2	-6.5	-0.5	-2.6	18	8.4	-57.413	4.63596
			8	44	49	39	13.8	-4.8	-11.2	-3.1	-5.3	-59.8708	-2.92507
			3	19	42	46	16.8	7	-3.8	-5.9	14.1	-56.3905	7.78179
			34	4	42	8	-1.4	16.1	-3.8	13.8	24.7	-54.4888	13.6319
			6	36	6	41	14.7	-2	14.7	-3.7	23.7	-54.6682	13.08
			39	9	28	34	-3.1	13.4	1	-1.4	9.9	-57.1439	5.46381
			33	42	43	16	-1.2	-3.8	-4	8.9	-0.1	-58.9379	-0.05519
			44	20	25	43	-4.8	6.4	3.1	-4	0.7	-58.7944	0.38633
			49	28	27	42	-11.2	1	1.5	-3.8	-12.5	-61.1625	-6.89875
			15	41	34	28	9.3	-3.7	-1.4	1	5.2	-57.9871	2.86988
			34	32	32	21	-1.4	-0.9	-0.9	5.7	2.5	-58.4715	1.37975
			18	42	9	5	7.6	-3.8	13.4	15.4	32.6	-53.0716	17.9919
			4	15	17	14	16.1	9.3	8.2	9.7	43.3	-51.152	23.8973
			13	22	8	11	10	4.8	13.8	11.7	40.3	-51.6902	22.2416
			37	17	20	23	-2.4	8.2	6.4	4.1	16.3	-55.9958	8.99597
			32	20	21	1	-0.9	6.4	5.7	19.1	30.3	-53.4842	16.7226
			19	7	34	7	7	14.2	-1.4	14.2	34	-52.8204	18.7646
			26	25	28	3	2.5	3.1	1	16.8	23.4	-54.722	12.9145
			43	27	19	2	-4	1.5	7	18	22.5	-54.8835	12.4177
			48	7	15	48	-9	14.2	9.3	-9	5.5	-57.9333	3.03545
			21	37	5	21	5.7	-2.4	15.4	5.7	24.4	-54.5426	13.4664
			43	11	1	11	-4	11.7	19.1	11.7	38.5	-52.0131	21.2481
			48	24	26	4	-9	3.6	2.5	16.1	13.2	-56.5519	7.28508
			16	36	28	32	8.9	-2	1	-0.9	7	-57.6642	3.8633
			38	6	25	24	-2.6	14.7	3.1	3.6	18.8	-55.5473	10.3757
			20	26	17	19	6.4	2.5	8.2	7	24.1	-54.5965	13.3008
			15	24	42	27	9.3	3.6	-3.8	1.5	10.6	-57.0184	5.85014
			42	33	15	18	-3.8	-1.2	9.3	7.6	11.9	-56.7851	6.56761
			32	18	46	15	-0.9	7.6	-5.9	9.3	10.1	-57.1081	5.57419
			30	45	37	27	0.2	-5	-2.4	1.5	-5.7	-59.9426	-3.14583
			36	33	15	46	-2	-1.2	9.3	-5.9	0.2	-58.8841	0.11038
			44	26	21	2	-4.8	2.5	5.7	18	21.4	-55.0808	11.8107
			42	41	1	44	-3.8	-3.7	19.1	-4.8	6.8	-57.7001	3.75292
			25	7	41	30	3.1	14.2	-3.7	0.2	13.8	-56.4443	7.61622
			18	43	28	47	7.6	-4	1	-6.5	-1.9	-59.2609	-1.04861
			8	47	9	30	13.8	-6.5	13.4	0.2	20.9	-55.1705	11.5347
			43	25	18	1	-4	3.1	7.6	19.1	25.8	-54.2915	14.239
			1	48	47	33	19.1	-9	-6.5	-1.2	2.4	-58.4894	1.32456
			44	22	32	44	-4.8	4.8	-0.9	-4.8	-5.7	-59.9426	-3.14583
			47	22	20	36	-6.5	4.8	6.4	-2	2.7	-58.4356	1.49013
			29	17	14	48	0.7	8.2	9.7	-9	9.6	-57.1978	5.29824
			34	34	5	24	-1.4	-1.4	15.4	3.6	16.2	-56.0137	8.94078
			28	48	11	5	1	-9	11.7	15.4	19.1	-55.4935	10.5413
			8	20	41	39	13.8	6.4	-3.7	-3.1	13.4	-56.516	7.39546
			47	6	1	8	-6.5	14.7	19.1	13.8	41.1	-51.5467	22.6831
			23	17	4	37	4.1	8.2	16.1	-2.4	26	-54.2556	14.3494
			42	29	43	34	-3.8	0.7	-4	-1.4	-8.5	-60.4449	-4.69115
			27	39	20	5	1.5	-3.1	6.4	15.4	20.2	-55.2961	11.1484
			40	4	29	47	-3.3	16.1	0.7	-6.5	7	-57.6642	3.8633
			33	41	29	40	-1.2	-3.7	0.7	-3.3	-7.5	-60.2655	-4.13925
			26	11	8	3	2.5	11.7	13.8	16.8	44.8	-50.8829	24.7251
			22	49	38	32	4.8	-11.2	-2.6	-0.9	-9.9	-60.6961	-5.46381
			21	33	46	50	5.7	-1.2	-5.9	-12.3	-13.7	-61.3778	-7.56103
			30	45	41	4	0.2	-5	-3.7	16.1	7.6	-57.5566	4.19444
			3	22	44	33	16.8	4.8	-4.8	-1.2	15.6	-56.1214	8.60964
			13	22	49	5	10	4.8	-11.2	15.4	19	-55.5114	10.4861
			21	37	6	43	5.7	-2.4	14.7	-4	14	-56.4084	7.7266
			38	8	35	36	-2.6	13.8	-1.8	-2	7.4	-57.5924	4.08406
			45	30	19	44	-5	0.2	7	-4.8	-2.6	-59.3864	-1.43494
			24	29	13	33	3.6	0.7	10	-1.2	13.1	-56.5699	7.22989
			21	4	28	15	5.7	16.1	1	9.3	32.1	-53.1613	17.716
			12	41	5	7	10.9	-3.7	15.4	14.2	36.8	-52.3181	20.3099
			48	5	29	42	-9	15.4	0.7	-3.8	3.3	-58.328	1.82127
			21	6	21	33	5.7	14.7	5.7	-1.2	24.9	-54.4529	13.7423
			1	2	3	31	19.1	18	16.8	-0.5	53.4	-49.34	29.4715
			42	23	38	32	-3.8	4.1	-2.6	-0.9	-3.2	-59.4941	-1.76608
			16	22	6	20	8.9	4.8	14.7	6.4	34.8	-52.6769	19.2061
			13	41	31	3	10	-3.7	-0.5	16.8	22.6	-54.8656	12.4729
			8	43	40	18	13.8	-4	-3.3	7.6	14.1	-56.3905	7.78179
			26	39	20	34	2.5	-3.1	6.4	-1.4	4.4	-58.1306	2.42836
			34	23	45	27	-1.4	4.1	-5	1.5	-0.8	-59.0635	-0.44152
			4	16	34	31	16.1	8.9	-1.4	-0.5	23.1	-54.7759	12.7489
			42	5	1	45	-3.8	15.4	19.1	-5	25.7	-54.3094	14.1838
			21	22	38	13	5.7	4.8	-2.6	10	17.9	-55.7087	9.87901
			45	39	12	46	-5	-3.1	10.9	-5.9	-3.1	-59.4761	-1.71089
			43	40	32	24	-4	-3.3	-0.9	3.6	-4.6	-59.7452	-2.53874
			6	44	12	3	14.7	-4.8	10.9	16.8	37.6	-52.1746	20.7514
			20	3	15	46	6.4	16.8	9.3	-5.9	26.6	-54.148	14.6805
			32	20	27	23	-0.9	6.4	1.5	4.1	11.1	-56.9287	6.12609
			40	39	1	45	-3.3	-3.1	19.1	-5	7.7	-57.5386	4.24963
			5	14	44	46	15.4	9.7	-4.8	-5.9	14.4	-56.3366	7.94736
			15	18	33	39	9.3	7.6	-1.2	-3.1	12.6	-56.6596	6.95394
			2	21	18	42	18	5.7	7.6	-3.8	27.5	-53.9865	15.1772
			47	42	14	32	-6.5	-3.8	9.7	-0.9	-1.5	-59.1891	-0.82785
			29	2	24	1	0.7	18	3.6	19.1	41.4	-51.4928	22.8487
			6	13	27	32	14.7	10	1.5	-0.9	25.3	-54.3812	13.9631
			8	26	10	6	13.8	2.5	12.2	14.7	43.2	-51.1699	23.8421
			30	19	49	38	0.2	7	-11.2	-2.6	-6.6	-60.104	-3.64254
			25	31	44	12	3.1	-0.5	-4.8	10.9	8.7	-57.3592	4.80153
			8	32	15	2	13.8	-0.9	9.3	18	40.2	-51.7081	22.1864
			12	30	6	37	10.9	0.2	14.7	-2.4	23.4	-54.722	12.9145
			36	17	42	22	-2	8.2	-3.8	4.8	7.2	-57.6283	3.97368
			25	21	5	30	3.1	5.7	15.4	0.2	24.4	-54.5426	13.4664
			38	17	20	8	-2.6	8.2	6.4	13.8	25.8	-54.2915	14.239
			4	35	11	4	16.1	-1.8	11.7	16.1	42.1	-51.3673	23.235
			35	32	18	44	-1.8	-0.9	7.6	-4.8	0.1	-58.9021	0.05519
			40	21	27	12	-3.3	5.7	1.5	10.9	14.8	-56.2649	8.16812
			33	20	31	36	-1.2	6.4	-0.5	-2	2.7	-58.4356	1.49013
			7	33	42	13	14.2	-1.2	-3.8	10	19.2	-55.4755	10.5965
			16	11	3	10	8.9	11.7	16.8	12.2	49.6	-50.0218	27.3742
			34	24	14	48	-1.4	3.6	9.7	-9	2.9	-58.3997	1.60051
			44	23	39	46	-4.8	4.1	-3.1	-5.9	-9.7	-60.6602	-5.35343
			26	14	7	31	2.5	9.7	14.2	-0.5	25.9	-54.2735	14.2942
			42	14	6	28	-3.8	9.7	14.7	1	21.6	-55.045	11.921
			18	10	38	46	7.6	12.2	-2.6	-5.9	11.3	-56.8928	6.23647
			39	7	8	9	-3.1	14.2	13.8	13.4	38.3	-52.049	21.1378
			30	47	24	46	0.2	-6.5	3.6	-5.9	-8.6	-60.4628	-4.74634
			2	34	21	27	18	-1.4	5.7	1.5	23.8	-54.6503	13.1352
			19	32	19	35	7	-0.9	7	-1.8	11.3	-56.8928	6.23647
			27	3	46	45	1.5	16.8	-5.9	-5	7.4	-57.5924	4.08406
			49	41	33	20	-11.2	-3.7	-1.2	6.4	-9.7	-60.6602	-5.35343
			16	43	2	9	8.9	-4	18	13.4	36.3	-52.4078	20.034
			45	42	26	20	-5	-3.8	2.5	6.4	0.1	-58.9021	0.05519
			4	33	9	34	16.1	-1.2	13.4	-1.4	26.9	-54.0941	14.8461
			44	16	38	28	-4.8	8.9	-2.6	1	2.5	-58.4715	1.37975
			14	49	34	36	9.7	-11.2	-1.4	-2	-4.9	-59.7991	-2.70431
			16	27	2	12	8.9	1.5	18	10.9	39.3	-51.8696	21.6897
			5	8	14	38	15.4	13.8	9.7	-2.6	36.3	-52.4078	20.034
			48	23	18	31	-9	4.1	7.6	-0.5	2.2	-58.5253	1.21418
			46	9	40	49	-5.9	13.4	-3.3	-11.2	-7	-60.1758	-3.8633
			8	38	29	8	13.8	-2.6	0.7	13.8	25.7	-54.3094	14.1838
			1	49	25	1	19.1	-11.2	3.1	19.1	30.1	-53.5201	16.6122
			8	41	49	50	13.8	-3.7	-11.2	-12.3	-13.4	-61.324	-7.39546
			5	36	22	7	15.4	-2	4.8	14.2	32.4	-53.1074	17.8816
			34	23	4	19	-1.4	4.1	16.1	7	25.8	-54.2915	14.239
			32	29	3	7	-0.9	0.7	16.8	14.2	30.8	-53.3945	16.9985
			12	43	1	21	10.9	-4	19.1	5.7	31.7	-53.233	17.4952
			36	6	41	40	-2	14.7	-3.7	-3.3	5.7	-57.8974	3.14583
			27	31	35	6	1.5	-0.5	-1.8	14.7	13.9	-56.4263	7.67141
			47	26	40	16	-6.5	2.5	-3.3	8.9	1.6	-58.633	0.88304
			32	17	32	23	-0.9	8.2	-0.9	4.1	10.5	-57.0363	5.79495
			46	50	40	46	-5.9	-12.3	-3.3	-5.9	-27.4	-63.8356	-15.1221
			44	6	47	34	-4.8	14.7	-6.5	-1.4	2	-58.5612	1.1038
			49	9	44	36	-11.2	13.4	-4.8	-2	-4.6	-59.7452	-2.53874
			40	50	24	39	-3.3	-12.3	3.6	-3.1	-15.1	-61.6289	-8.33369
			15	23	33	9	9.3	4.1	-1.2	13.4	25.6	-54.3274	14.1286
			11	20	4	37	11.7	6.4	16.1	-2.4	31.8	-53.2151	17.5504
			29	21	4	36	0.7	5.7	16.1	-2	20.5	-55.2423	11.3139
			41	45	44	43	-3.7	-5	-4.8	-4	-17.5	-62.0595	-9.65825
			4	39	8	34	16.1	-3.1	13.8	-1.4	25.4	-54.3632	14.0183
			37	19	24	22	-2.4	7	3.6	4.8	13	-56.5878	7.1747
			21	14	16	27	5.7	9.7	8.9	1.5	25.8	-54.2915	14.239
			49	19	47	17	-11.2	7	-6.5	8.2	-2.5	-59.3685	-1.37975
			27	26	40	5	1.5	2.5	-3.3	15.4	16.1	-56.0317	8.88559
			26	38	3	19	2.5	-2.6	16.8	7	23.7	-54.6682	13.08
			13	47	49	5	10	-6.5	-11.2	15.4	7.7	-57.5386	4.24963
			16	33	7	28	8.9	-1.2	14.2	1	22.9	-54.8117	12.6385
			27	40	38	1	1.5	-3.3	-2.6	19.1	14.7	-56.2828	8.11293
			24	11	48	6	3.6	11.7	-9	14.7	21	-55.1526	11.5899
			39	24	13	43	-3.1	3.6	10	-4	6.5	-57.7539	3.58735
			13	29	30	6	10	0.7	0.2	14.7	25.6	-54.3274	14.1286
			25	26	3	18	3.1	2.5	16.8	7.6	30	-53.538	16.557
			16	37	31	33	8.9	-2.4	-0.5	-1.2	4.8	-58.0589	2.64912
			48	1	39	31	-9	19.1	-3.1	-0.5	6.5	-57.7539	3.58735
			1	11	27	13	19.1	11.7	1.5	10	42.3	-51.3314	23.3454
			17	37	11	40	8.2	-2.4	11.7	-3.3	14.2	-56.3725	7.83698
			34	33	2	13	-1.4	-1.2	18	10	25.4	-54.3632	14.0183
			12	17	10	47	10.9	8.2	12.2	-6.5	24.8	-54.4709	13.6871
			20	22	44	32	6.4	4.8	-4.8	-0.9	5.5	-57.9333	3.03545
			48	7	18	13	-9	14.2	7.6	10	22.8	-54.8297	12.5833
			37	24	11	24	-2.4	3.6	11.7	3.6	16.5	-55.9599	9.10635
			30	45	47	16	0.2	-5	-6.5	8.9	-2.4	-59.3506	-1.32456
			24	19	19	5	3.6	7	7	15.4	33	-52.9998	18.2127
			13	45	6	12	10	-5	14.7	10.9	30.6	-53.4304	16.8881
			18	39	20	46	7.6	-3.1	6.4	-5.9	5	-58.023	2.7595
			11	11	18	37	11.7	11.7	7.6	-2.4	28.6	-53.7892	15.7843
			19	42	37	31	7	-3.8	-2.4	-0.5	0.3	-58.8662	0.16557
			39	36	17	3	-3.1	-2	8.2	16.8	19.9	-55.3499	10.9828
			32	45	35	33	-0.9	-5	-1.8	-1.2	-8.9	-60.5167	-4.91191
			27	32	22	39	1.5	-0.9	4.8	-3.1	2.3	-58.5074	1.26937
			3	1	40	18	16.8	19.1	-3.3	7.6	40.2	-51.7081	22.1864
			43	8	1	45	-4	13.8	19.1	-5	23.9	-54.6323	13.1904
			18	45	2	12	7.6	-5	18	10.9	31.5	-53.2689	17.3848
			43	12	11	30	-4	10.9	11.7	0.2	18.8	-55.5473	10.3757
			5	15	11	36	15.4	9.3	11.7	-2	34.4	-52.7486	18.9854
			50	14	2	8	-12.3	9.7	18	13.8	29.2	-53.6815	16.1155
			33	38	40	29	-1.2	-2.6	-3.3	0.7	-6.4	-60.0682	-3.53216
			41	27	8	21	-3.7	1.5	13.8	5.7	17.3	-55.8164	9.54787
			34	4	44	41	-1.4	16.1	-4.8	-3.7	6.2	-57.8077	3.42178
			4	47	2	48	16.1	-6.5	18	-9	18.6	-55.5832	10.2653
			7	46	20	44	14.2	-5.9	6.4	-4.8	9.9	-57.1439	5.46381
			23	12	6	16	4.1	10.9	14.7	8.9	38.6	-51.9952	21.3033
			33	43	6	45	-1.2	-4	14.7	-5	4.5	-58.1127	2.48355
			19	39	15	7	7	-3.1	9.3	14.2	27.4	-54.0044	15.1221
			19	34	41	6	7	-1.4	-3.7	14.7	16.6	-55.942	9.16154
			19	46	7	10	7	-5.9	14.2	12.2	27.5	-53.9865	15.1772
			17	10	10	1	8.2	12.2	12.2	19.1	51.7	-49.645	28.5332
			48	2	5	4	-9	18	15.4	16.1	40.5	-51.6543	22.3519
			20	22	22	39	6.4	4.8	4.8	-3.1	12.9	-56.6057	7.11951
			41	2	36	26	-3.7	18	-2	2.5	14.8	-56.2649	8.16812
			28	50	29	21	1	-12.3	0.7	5.7	-4.9	-59.7991	-2.70431
			5	21	22	48	15.4	5.7	4.8	-9	16.9	-55.8881	9.32711
			8	50	5	34	13.8	-12.3	15.4	-1.4	15.5	-56.1393	8.55445
			50	21	9	7	-12.3	5.7	13.4	14.2	21	-55.1526	11.5899
			8	11	1	28	13.8	11.7	19.1	1	45.6	-50.7394	25.1666
			43	45	4	47	-4	-5	16.1	-6.5	0.6	-58.8124	0.33114
			20	10	48	14	6.4	12.2	-9	9.7	19.3	-55.4576	10.6517
			10	41	5	35	12.2	-3.7	15.4	-1.8	22.1	-54.9553	12.197
			3	15	37	30	16.8	9.3	-2.4	0.2	23.9	-54.6323	13.1904
			10	19	13	40	12.2	7	10	-3.3	25.9	-54.2735	14.2942
			36	13	6	6	-2	10	14.7	14.7	37.4	-52.2104	20.6411
			23	37	27	26	4.1	-2.4	1.5	2.5	5.7	-57.8974	3.14583
			13	20	25	45	10	6.4	3.1	-5	14.5	-56.3187	8.00255
			25	19	43	45	3.1	7	-4	-5	1.1	-58.7227	0.60709
			7	7	22	13	14.2	14.2	4.8	10	43.2	-51.1699	23.8421
			48	47	43	12	-9	-6.5	-4	10.9	-8.6	-60.4628	-4.74634
			23	32	3	44	4.1	-0.9	16.8	-4.8	15.2	-56.1931	8.38888
			35	6	27	5	-1.8	14.7	1.5	15.4	29.8	-53.5739	16.4466
			43	15	5	14	-4	9.3	15.4	9.7	30.4	-53.4662	16.7778
			28	25	23	39	1	3.1	4.1	-3.1	5.1	-58.0051	2.81469
			2	16	17	15	18	8.9	8.2	9.3	44.4	-50.9546	24.5044
			35	11	13	33	-1.8	11.7	10	-1.2	18.7	-55.5652	10.3205
			37	49	27	18	-2.4	-11.2	1.5	7.6	-4.5	-59.7273	-2.48355
			26	8	30	31	2.5	13.8	0.2	-0.5	16	-56.0496	8.8304
			14	14	22	29	9.7	9.7	4.8	0.7	24.9	-54.4529	13.7423
			7	1	2	45	14.2	19.1	18	-5	46.3	-50.6138	25.553
			39	45	38	8	-3.1	-5	-2.6	13.8	3.1	-58.3639	1.71089
			46	47	47	2	-5.9	-6.5	-6.5	18	-0.9	-59.0815	-0.49671
			6	14	24	8	14.7	9.7	3.6	13.8	41.8	-51.4211	23.0694
			28	26	17	25	1	2.5	8.2	3.1	14.8	-56.2649	8.16812
			6	27	1	38	14.7	1.5	19.1	-2.6	32.7	-53.0536	18.0471
			20	44	17	44	6.4	-4.8	8.2	-4.8	5	-58.023	2.7595
			42	15	12	37	-3.8	9.3	10.9	-2.4	14	-56.4084	7.7266
			35	41	37	8	-1.8	-3.7	-2.4	13.8	5.9	-57.8615	3.25621
			2	8	33	22	18	13.8	-1.2	4.8	35.4	-52.5692	19.5373
			39	38	10	30	-3.1	-2.6	12.2	0.2	6.7	-57.718	3.69773
			11	6	20	22	11.7	14.7	6.4	4.8	37.6	-52.1746	20.7514
			48	30	3	44	-9	0.2	16.8	-4.8	3.2	-58.3459	1.76608
			44	11	38	48	-4.8	11.7	-2.6	-9	-4.7	-59.7632	-2.59393
			27	43	22	14	1.5	-4	4.8	9.7	12	-56.7672	6.6228
			48	5	34	31	-9	15.4	-1.4	-0.5	4.5	-58.1127	2.48355
			46	26	17	22	-5.9	2.5	8.2	4.8	9.6	-57.1978	5.29824
			24	10	50	50	3.6	12.2	-12.3	-12.3	-8.8	-60.4987	-4.85672
			44	10	26	4	-4.8	12.2	2.5	16.1	26	-54.2556	14.3494
			40	15	33	27	-3.3	9.3	-1.2	1.5	6.3	-57.7898	3.47697
			25	12	22	1	3.1	10.9	4.8	19.1	37.9	-52.1207	20.917
			30	16	11	23	0.2	8.9	11.7	4.1	24.9	-54.4529	13.7423
			45	48	15	49	-5	-9	9.3	-11.2	-15.9	-61.7725	-8.77521
			45	15	34	28	-5	9.3	-1.4	1	3.9	-58.2203	2.15241
			31	29	20	11	-0.5	0.7	6.4	11.7	18.3	-55.637	10.0998
			5	20	18	44	15.4	6.4	7.6	-4.8	24.6	-54.5068	13.5767
			38	7	26	8	-2.6	14.2	2.5	13.8	27.9	-53.9147	15.398
			46	44	37	34	-5.9	-4.8	-2.4	-1.4	-14.5	-61.5213	-8.00255
			28	40	13	41	1	-3.3	10	-3.7	4	-58.2024	2.2076
			44	14	44	34	-4.8	9.7	-4.8	-1.4	-1.3	-59.1532	-0.71747
			7	6	29	42	14.2	14.7	0.7	-3.8	25.8	-54.2915	14.239
			11	17	49	42	11.7	8.2	-11.2	-3.8	4.9	-58.0409	2.70431
			44	4	45	10	-4.8	16.1	-5	12.2	18.5	-55.6011	10.2101
			9	22	6	1	13.4	4.8	14.7	19.1	52	-49.5912	28.6988
			14	43	42	3	9.7	-4	-3.8	16.8	18.7	-55.5652	10.3205
			26	3	6	11	2.5	16.8	14.7	11.7	45.7	-50.7214	25.2218
			26	44	31	50	2.5	-4.8	-0.5	-12.3	-15.1	-61.6289	-8.33369
			39	44	11	6	-3.1	-4.8	11.7	14.7	18.5	-55.6011	10.2101
			29	47	42	1	0.7	-6.5	-3.8	19.1	9.5	-57.2157	5.24305
			46	11	34	24	-5.9	11.7	-1.4	3.6	8	-57.4848	4.4152
			15	33	15	39	9.3	-1.2	9.3	-3.1	14.3	-56.3546	7.89217
			10	8	20	8	12.2	13.8	6.4	13.8	46.2	-50.6317	25.4978
			40	36	20	12	-3.3	-2	6.4	10.9	12	-56.7672	6.6228
			41	7	18	30	-3.7	14.2	7.6	0.2	18.3	-55.637	10.0998
			28	7	11	22	1	14.2	11.7	4.8	31.7	-53.233	17.4952
			9	43	10	8	13.4	-4	12.2	13.8	35.4	-52.5692	19.5373
			48	42	5	50	-9	-3.8	15.4	-12.3	-9.7	-60.6602	-5.35343
			24	45	11	13	3.6	-5	11.7	10	20.3	-55.2782	11.2036
			22	27	22	41	4.8	1.5	4.8	-3.7	7.4	-57.5924	4.08406
			35	7	10	30	-1.8	14.2	12.2	0.2	24.8	-54.4709	13.6871
			6	41	42	6	14.7	-3.7	-3.8	14.7	21.9	-54.9911	12.0866
			32	1	49	8	-0.9	19.1	-11.2	13.8	20.8	-55.1885	11.4795
			50	23	4	45	-12.3	4.1	16.1	-5	2.9	-58.3997	1.60051
			21	14	31	47	5.7	9.7	-0.5	-6.5	8.4	-57.413	4.63596
			39	2	41	27	-3.1	18	-3.7	1.5	12.7	-56.6416	7.00913
			26	42	5	12	2.5	-3.8	15.4	10.9	25	-54.435	13.7975
			40	48	17	37	-3.3	-9	8.2	-2.4	-6.5	-60.0861	-3.58735
			25	8	44	38	3.1	13.8	-4.8	-2.6	9.5	-57.2157	5.24305
			39	24	12	15	-3.1	3.6	10.9	9.3	20.7	-55.2064	11.4243
			32	47	19	29	-0.9	-6.5	7	0.7	0.3	-58.8662	0.16557
			14	32	1	22	9.7	-0.9	19.1	4.8	32.7	-53.0536	18.0471
			33	41	34	50	-1.2	-3.7	-1.4	-12.3	-18.6	-62.2568	-10.2653
			40	8	14	29	-3.3	13.8	9.7	0.7	20.9	-55.1705	11.5347
			34	44	21	26	-1.4	-4.8	5.7	2.5	2	-58.5612	1.1038
			21	5	33	5	5.7	15.4	-1.2	15.4	35.3	-52.5872	19.4821
			34	42	43	40	-1.4	-3.8	-4	-3.3	-12.5	-61.1625	-6.89875
			30	1	27	25	0.2	19.1	1.5	3.1	23.9	-54.6323	13.1904
			28	50	2	27	1	-12.3	18	1.5	8.2	-57.4489	4.52558
			32	5	23	42	-0.9	15.4	4.1	-3.8	14.8	-56.2649	8.16812
			25	19	48	29	3.1	7	-9	0.7	1.8	-58.5971	0.99342
			39	16	47	23	-3.1	8.9	-6.5	4.1	3.4	-58.31	1.87646
			2	2	15	49	18	18	9.3	-11.2	34.1	-52.8025	18.8198
			12	38	5	46	10.9	-2.6	15.4	-5.9	17.8	-55.7267	9.82382
			23	45	40	43	4.1	-5	-3.3	-4	-8.2	-60.3911	-4.52558
			7	4	16	31	14.2	16.1	8.9	-0.5	38.7	-51.9772	21.3585
			47	40	11	1	-6.5	-3.3	11.7	19.1	21	-55.1526	11.5899
			25	36	36	32	3.1	-2	-2	-0.9	-1.8	-59.2429	-0.99342
			17	3	11	28	8.2	16.8	11.7	1	37.7	-52.1566	20.8066
			16	37	6	27	8.9	-2.4	14.7	1.5	22.7	-54.8476	12.5281
			15	41	40	36	9.3	-3.7	-3.3	-2	0.3	-58.8662	0.16557
			39	37	30	47	-3.1	-2.4	0.2	-6.5	-11.8	-61.0369	-6.51242
			32	34	6	6	-0.9	-1.4	14.7	14.7	27.1	-54.0583	14.9565
			43	6	19	12	-4	14.7	7	10.9	28.6	-53.7892	15.7843
			22	10	42	43	4.8	12.2	-3.8	-4	9.2	-57.2695	5.07748
			7	37	17	31	14.2	-2.4	8.2	-0.5	19.5	-55.4217	10.762
			10	13	18	14	12.2	10	7.6	9.7	39.5	-51.8337	21.8
			9	5	16	28	13.4	15.4	8.9	1	38.7	-51.9772	21.3585
			13	2	40	15	10	18	-3.3	9.3	34	-52.8204	18.7646
			31	1	13	22	-0.5	19.1	10	4.8	33.4	-52.928	18.4335
			38	4	50	15	-2.6	16.1	-12.3	9.3	10.5	-57.0363	5.79495
			16	26	25	41	8.9	2.5	3.1	-3.7	10.8	-56.9825	5.96052
			21	43	21	41	5.7	-4	5.7	-3.7	3.7	-58.2562	2.04203
			17	25	2	21	8.2	3.1	18	5.7	35	-52.641	19.3165
			32	39	50	41	-0.9	-3.1	-12.3	-3.7	-20	-62.508	-11.038
			44	28	20	15	-4.8	1	6.4	9.3	11.9	-56.7851	6.56761
			44	37	41	11	-4.8	-2.4	-3.7	11.7	0.8	-58.7765	0.44152
			30	29	3	2	0.2	0.7	16.8	18	35.7	-52.5154	19.7028
			34	44	30	6	-1.4	-4.8	0.2	14.7	8.7	-57.3592	4.80153
			46	26	28	38	-5.9	2.5	1	-2.6	-5	-59.817	-2.7595
			16	15	21	49	8.9	9.3	5.7	-11.2	12.7	-56.6416	7.00913
			46	28	43	23	-5.9	1	-4	4.1	-4.8	-59.7811	-2.64912
			16	8	5	27	8.9	13.8	15.4	1.5	39.6	-51.8158	21.8552
			32	28	46	34	-0.9	1	-5.9	-1.4	-7.2	-60.2117	-3.97368
			46	19	45	5	-5.9	7	-5	15.4	11.5	-56.8569	6.34685
			13	25	49	16	10	3.1	-11.2	8.9	10.8	-56.9825	5.96052
			41	11	21	9	-3.7	11.7	5.7	13.4	27.1	-54.0583	14.9565
			7	30	40	23	14.2	0.2	-3.3	4.1	15.2	-56.1931	8.38888
			7	18	35	42	14.2	7.6	-1.8	-3.8	16.2	-56.0137	8.94078
			10	36	20	35	12.2	-2	6.4	-1.8	14.8	-56.2649	8.16812
			8	37	46	6	13.8	-2.4	-5.9	14.7	20.2	-55.2961	11.1484
			2	21	49	36	18	5.7	-11.2	-2	10.5	-57.0363	5.79495
			18	49	11	34	7.6	-11.2	11.7	-1.4	6.7	-57.718	3.69773
			23	3	22	5	4.1	16.8	4.8	15.4	41.1	-51.5467	22.6831
			25	18	34	9	3.1	7.6	-1.4	13.4	22.7	-54.8476	12.5281
			2	5	45	33	18	15.4	-5	-1.2	27.2	-54.0403	15.0117
			41	35	38	35	-3.7	-1.8	-2.6	-1.8	-9.9	-60.6961	-5.46381
			34	45	26	13	-1.4	-5	2.5	10	6.1	-57.8257	3.36659
			20	25	30	36	6.4	3.1	0.2	-2	7.7	-57.5386	4.24963
			10	7	26	35	12.2	14.2	2.5	-1.8	27.1	-54.0583	14.9565
			8	5	22	31	13.8	15.4	4.8	-0.5	33.5	-52.9101	18.4886
			31	30	46	7	-0.5	0.2	-5.9	14.2	8	-57.4848	4.4152
			44	7	1	18	-4.8	14.2	19.1	7.6	36.1	-52.4437	19.9236
			32	45	15	1	-0.9	-5	9.3	19.1	22.5	-54.8835	12.4177
			3	40	26	17	16.8	-3.3	2.5	8.2	24.2	-54.5785	13.356
			26	4	24	18	2.5	16.1	3.6	7.6	29.8	-53.5739	16.4466
			39	11	49	29	-3.1	11.7	-11.2	0.7	-1.9	-59.2609	-1.04861
			43	48	31	19	-4	-9	-0.5	7	-6.5	-60.0861	-3.58735
			31	37	27	15	-0.5	-2.4	1.5	9.3	7.9	-57.5027	4.36001
			2	29	8	25	18	0.7	13.8	3.1	35.6	-52.5334	19.6476
			40	20	25	40	-3.3	6.4	3.1	-3.3	2.9	-58.3997	1.60051
			36	41	38	5	-2	-3.7	-2.6	15.4	7.1	-57.6463	3.91849
			10	46	14	23	12.2	-5.9	9.7	4.1	20.1	-55.3141	11.0932
			37	13	47	23	-2.4	10	-6.5	4.1	5.2	-57.9871	2.86988
			18	36	44	22	7.6	-2	-4.8	4.8	5.6	-57.9154	3.09064
			30	24	8	24	0.2	3.6	13.8	3.6	21.2	-55.1167	11.7003
			24	35	29	39	3.6	-1.8	0.7	-3.1	-0.6	-59.0276	-0.33114
			40	47	10	34	-3.3	-6.5	12.2	-1.4	1	-58.7406	0.5519
			28	12	22	17	1	10.9	4.8	8.2	24.9	-54.4529	13.7423
			50	35	31	42	-12.3	-1.8	-0.5	-3.8	-18.4	-62.221	-10.155
			34	25	4	36	-1.4	3.1	16.1	-2	15.8	-56.0855	8.72002
			45	36	39	44	-5	-2	-3.1	-4.8	-14.9	-61.5931	-8.22331
			3	47	5	37	16.8	-6.5	15.4	-2.4	23.3	-54.74	12.8593
			14	2	12	16	9.7	18	10.9	8.9	47.5	-50.3985	26.2152
			34	36	8	11	-1.4	-2	13.8	11.7	22.1	-54.9553	12.197
			39	15	1	31	-3.1	9.3	19.1	-0.5	24.8	-54.4709	13.6871
			44	45	47	9	-4.8	-5	-6.5	13.4	-2.9	-59.4403	-1.60051
			15	26	45	5	9.3	2.5	-5	15.4	22.2	-54.9373	12.2522
			22	11	30	9	4.8	11.7	0.2	13.4	30.1	-53.5201	16.6122
			19	25	44	3	7	3.1	-4.8	16.8	22.1	-54.9553	12.197
			38	9	28	22	-2.6	13.4	1	4.8	16.6	-55.942	9.16154
			49	28	14	34	-11.2	1	9.7	-1.4	-1.9	-59.2609	-1.04861
			13	38	18	13	10	-2.6	7.6	10	25	-54.435	13.7975
			33	34	37	46	-1.2	-1.4	-2.4	-5.9	-10.9	-60.8755	-6.01571
			27	20	41	23	1.5	6.4	-3.7	4.1	8.3	-57.431	4.58077
			4	18	22	27	16.1	7.6	4.8	1.5	30	-53.538	16.557
			41	39	25	9	-3.7	-3.1	3.1	13.4	9.7	-57.1798	5.35343
			5	2	39	49	15.4	18	-3.1	-11.2	19.1	-55.4935	10.5413
			30	19	50	22	0.2	7	-12.3	4.8	-0.3	-58.9738	-0.16557
			29	12	32	4	0.7	10.9	-0.9	16.1	26.8	-54.1121	14.7909
			5	5	16	7	15.4	15.4	8.9	14.2	53.9	-49.2503	29.7474
			20	48	32	22	6.4	-9	-0.9	4.8	1.3	-58.6868	0.71747
			23	13	37	2	4.1	10	-2.4	18	29.7	-53.5918	16.3914
			33	5	44	34	-1.2	15.4	-4.8	-1.4	8	-57.4848	4.4152
			29	47	6	16	0.7	-6.5	14.7	8.9	17.8	-55.7267	9.82382
			22	14	13	40	4.8	9.7	10	-3.3	21.2	-55.1167	11.7003
			41	28	46	46	-3.7	1	-5.9	-5.9	-14.5	-61.5213	-8.00255
			8	31	37	20	13.8	-0.5	-2.4	6.4	17.3	-55.8164	9.54787
			46	36	23	10	-5.9	-2	4.1	12.2	8.4	-57.413	4.63596
			46	25	27	2	-5.9	3.1	1.5	18	16.7	-55.924	9.21673
			34	27	41	40	-1.4	1.5	-3.7	-3.3	-6.9	-60.1579	-3.80811
			30	1	45	20	0.2	19.1	-5	6.4	20.7	-55.2064	11.4243
			44	15	5	37	-4.8	9.3	15.4	-2.4	17.5	-55.7805	9.65825
			22	29	50	47	4.8	0.7	-12.3	-6.5	-13.3	-61.306	-7.34027
			4	35	11	42	16.1	-1.8	11.7	-3.8	22.2	-54.9373	12.2522
			1	9	7	47	19.1	13.4	14.2	-6.5	40.2	-51.7081	22.1864
			8	34	39	37	13.8	-1.4	-3.1	-2.4	6.9	-57.6821	3.80811
			27	1	25	34	1.5	19.1	3.1	-1.4	22.3	-54.9194	12.3074
			39	43	49	15	-3.1	-4	-11.2	9.3	-9	-60.5346	-4.9671
			19	36	28	47	7	-2	1	-6.5	-0.5	-59.0097	-0.27595
			42	44	34	16	-3.8	-4.8	-1.4	8.9	-1.1	-59.1173	-0.60709
			47	11	39	16	-6.5	11.7	-3.1	8.9	11	-56.9466	6.0709
			5	4	26	37	15.4	16.1	2.5	-2.4	31.6	-53.251	17.44
			46	9	11	8	-5.9	13.4	11.7	13.8	33	-52.9998	18.2127
			8	23	4	8	13.8	4.1	16.1	13.8	47.8	-50.3447	26.3808
			29	9	15	6	0.7	13.4	9.3	14.7	38.1	-52.0849	21.0274
			38	13	1	31	-2.6	10	19.1	-0.5	26	-54.2556	14.3494
			6	50	33	1	14.7	-12.3	-1.2	19.1	20.3	-55.2782	11.2036
			40	29	23	3	-3.3	0.7	4.1	16.8	18.3	-55.637	10.0998
			38	2	50	43	-2.6	18	-12.3	-4	-0.9	-59.0815	-0.49671
			46	47	37	46	-5.9	-6.5	-2.4	-5.9	-20.7	-62.6336	-11.4243
			46	42	7	11	-5.9	-3.8	14.2	11.7	16.2	-56.0137	8.94078
			46	30	40	27	-5.9	0.2	-3.3	1.5	-7.5	-60.2655	-4.13925
			21	37	25	18	5.7	-2.4	3.1	7.6	14	-56.4084	7.7266
			24	49	17	14	3.6	-11.2	8.2	9.7	10.3	-57.0722	5.68457
			2	8	3	42	18	13.8	16.8	-3.8	44.8	-50.8829	24.7251
			33	6	33	12	-1.2	14.7	-1.2	10.9	23.2	-54.7579	12.8041
			48	22	35	25	-9	4.8	-1.8	3.1	-2.9	-59.4403	-1.60051
			46	42	42	7	-5.9	-3.8	-3.8	14.2	0.7	-58.7944	0.38633
			18	22	3	28	7.6	4.8	16.8	1	30.2	-53.5021	16.6674
			25	17	44	8	3.1	8.2	-4.8	13.8	20.3	-55.2782	11.2036
			26	8	3	32	2.5	13.8	16.8	-0.9	32.2	-53.1433	17.7712
			37	33	5	6	-2.4	-1.2	15.4	14.7	26.5	-54.1659	14.6253
			1	40	3	11	19.1	-3.3	16.8	11.7	44.3	-50.9726	24.4492
			22	3	45	2	4.8	16.8	-5	18	34.6	-52.7128	19.0957
			13	32	36	12	10	-0.9	-2	10.9	18	-55.6908	9.9342
			21	27	38	43	5.7	1.5	-2.6	-4	0.6	-58.8124	0.33114
			45	9	36	10	-5	13.4	-2	12.2	18.6	-55.5832	10.2653
			2	21	49	20	18	5.7	-11.2	6.4	18.9	-55.5293	10.4309
			33	25	31	19	-1.2	3.1	-0.5	7	8.4	-57.413	4.63596
			30	15	5	14	0.2	9.3	15.4	9.7	34.6	-52.7128	19.0957
			18	36	20	20	7.6	-2	6.4	6.4	18.4	-55.619	10.155
			46	34	19	10	-5.9	-1.4	7	12.2	11.9	-56.7851	6.56761
			44	19	5	38	-4.8	7	15.4	-2.6	15	-56.229	8.2785
			46	1	49	4	-5.9	19.1	-11.2	16.1	18.1	-55.6729	9.98939
			11	2	42	32	11.7	18	-3.8	-0.9	25	-54.435	13.7975
			16	23	47	11	8.9	4.1	-6.5	11.7	18.2	-55.6549	10.0446
			48	3	31	15	-9	16.8	-0.5	9.3	16.6	-55.942	9.16154
			15	21	44	50	9.3	5.7	-4.8	-12.3	-2.1	-59.2967	-1.15899
			5	47	50	15	15.4	-6.5	-12.3	9.3	5.9	-57.8615	3.25621
			26	47	31	4	2.5	-6.5	-0.5	16.1	11.6	-56.839	6.40204
			11	1	49	33	11.7	19.1	-11.2	-1.2	18.4	-55.619	10.155
			35	15	1	8	-1.8	9.3	19.1	13.8	40.4	-51.6722	22.2968
			5	28	2	27	15.4	1	18	1.5	35.9	-52.4795	19.8132
			2	48	11	22	18	-9	11.7	4.8	25.5	-54.3453	14.0734
			45	47	3	42	-5	-6.5	16.8	-3.8	1.5	-58.6509	0.82785
			31	11	10	48	-0.5	11.7	12.2	-9	14.4	-56.3366	7.94736
			43	18	1	40	-4	7.6	19.1	-3.3	19.4	-55.4396	10.7069
			40	45	10	14	-3.3	-5	12.2	9.7	13.6	-56.4802	7.50584
			32	18	22	13	-0.9	7.6	4.8	10	21.5	-55.0629	11.8658
			9	11	42	1	13.4	11.7	-3.8	19.1	40.4	-51.6722	22.2968
			13	40	15	45	10	-3.3	9.3	-5	11	-56.9466	6.0709
			45	30	36	11	-5	0.2	-2	11.7	4.9	-58.0409	2.70431
			13	12	41	13	10	10.9	-3.7	10	27.2	-54.0403	15.0117
			29	49	41	18	0.7	-11.2	-3.7	7.6	-6.6	-60.104	-3.64254
			17	41	5	32	8.2	-3.7	15.4	-0.9	19	-55.5114	10.4861
			29	40	43	40	0.7	-3.3	-4	-3.3	-9.9	-60.6961	-5.46381
			38	20	30	31	-2.6	6.4	0.2	-0.5	3.5	-58.2921	1.93165
			24	25	34	7	3.6	3.1	-1.4	14.2	19.5	-55.4217	10.762
			16	5	16	14	8.9	15.4	8.9	9.7	42.9	-51.2237	23.6765
			24	44	21	19	3.6	-4.8	5.7	7	11.5	-56.8569	6.34685
			40	4	30	5	-3.3	16.1	0.2	15.4	28.4	-53.825	15.674
			11	1	38	7	11.7	19.1	-2.6	14.2	42.4	-51.3134	23.4006
			1	34	42	8	19.1	-1.4	-3.8	13.8	27.7	-53.9506	15.2876
			2	49	6	34	18	-11.2	14.7	-1.4	20.1	-55.3141	11.0932
			32	27	19	46	-0.9	1.5	7	-5.9	1.7	-58.615	0.93823
			14	39	30	12	9.7	-3.1	0.2	10.9	17.7	-55.7446	9.76863
			49	8	48	41	-11.2	13.8	-9	-3.7	-10.1	-60.7319	-5.57419
			28	16	10	40	1	8.9	12.2	-3.3	18.8	-55.5473	10.3757
			36	20	29	33	-2	6.4	0.7	-1.2	3.9	-58.2203	2.15241
			4	28	20	49	16.1	1	6.4	-11.2	12.3	-56.7134	6.78837
			36	31	44	25	-2	-0.5	-4.8	3.1	-4.2	-59.6735	-2.31798
			18	5	50	47	7.6	15.4	-12.3	-6.5	4.2	-58.1665	2.31798
			35	10	50	19	-1.8	12.2	-12.3	7	5.1	-58.0051	2.81469
			35	18	20	7	-1.8	7.6	6.4	14.2	26.4	-54.1838	14.5702
			23	17	28	14	4.1	8.2	1	9.7	23	-54.7938	12.6937
			41	24	1	47	-3.7	3.6	19.1	-6.5	12.5	-56.6775	6.89875
			10	28	38	2	12.2	1	-2.6	18	28.6	-53.7892	15.7843
			14	45	18	5	9.7	-5	7.6	15.4	27.7	-53.9506	15.2876
			17	14	21	4	8.2	9.7	5.7	16.1	39.7	-51.7978	21.9104
			32	40	46	17	-0.9	-3.3	-5.9	8.2	-1.9	-59.2609	-1.04861
			49	47	9	43	-11.2	-6.5	13.4	-4	-8.3	-60.409	-4.58077
			35	9	17	3	-1.8	13.4	8.2	16.8	36.6	-52.354	20.1995
			35	17	49	22	-1.8	8.2	-11.2	4.8	0	-58.92	0
			5	45	22	40	15.4	-5	4.8	-3.3	11.9	-56.7851	6.56761
			2	23	18	15	18	4.1	7.6	9.3	39	-51.9234	21.5241
			38	42	50	43	-2.6	-3.8	-12.3	-4	-22.7	-62.9924	-12.5281
			9	25	50	18	13.4	3.1	-12.3	7.6	11.8	-56.8031	6.51242
			4	39	27	9	16.1	-3.1	1.5	13.4	27.9	-53.9147	15.398
			21	44	19	12	5.7	-4.8	7	10.9	18.8	-55.5473	10.3757
			39	31	43	28	-3.1	-0.5	-4	1	-6.6	-60.104	-3.64254
			33	32	7	27	-1.2	-0.9	14.2	1.5	13.6	-56.4802	7.50584
			45	14	18	9	-5	9.7	7.6	13.4	25.7	-54.3094	14.1838
			46	23	29	7	-5.9	4.1	0.7	14.2	13.1	-56.5699	7.22989
			8	48	18	17	13.8	-9	7.6	8.2	20.6	-55.2244	11.3691
			36	34	33	19	-2	-1.4	-1.2	7	2.4	-58.4894	1.32456
			30	19	4	19	0.2	7	16.1	7	30.3	-53.4842	16.7226
			24	41	24	28	3.6	-3.7	3.6	1	4.5	-58.1127	2.48355
			1	44	27	45	19.1	-4.8	1.5	-5	10.8	-56.9825	5.96052
			16	10	16	10	8.9	12.2	8.9	12.2	42.2	-51.3493	23.2902
			42	49	41	36	-3.8	-11.2	-3.7	-2	-20.7	-62.6336	-11.4243
			12	6	31	19	10.9	14.7	-0.5	7	32.1	-53.1613	17.716
			46	48	10	17	-5.9	-9	12.2	8.2	5.5	-57.9333	3.03545
			45	8	39	39	-5	13.8	-3.1	-3.1	2.6	-58.4536	1.43494
			1	6	12	21	19.1	14.7	10.9	5.7	50.4	-49.8782	27.8158
			41	20	21	5	-3.7	6.4	5.7	15.4	23.8	-54.6503	13.1352
			49	16	50	23	-11.2	8.9	-12.3	4.1	-10.5	-60.8037	-5.79495
			10	21	24	31	12.2	5.7	3.6	-0.5	21	-55.1526	11.5899
			9	8	50	33	13.4	13.8	-12.3	-1.2	13.7	-56.4622	7.56103
			16	26	3	44	8.9	2.5	16.8	-4.8	23.4	-54.722	12.9145
			22	3	23	5	4.8	16.8	4.1	15.4	41.1	-51.5467	22.6831
			9	50	19	3	13.4	-12.3	7	16.8	24.9	-54.4529	13.7423
			13	47	50	46	10	-6.5	-12.3	-5.9	-14.7	-61.5572	-8.11293
			34	4	48	3	-1.4	16.1	-9	16.8	22.5	-54.8835	12.4177
			20	20	1	5	6.4	6.4	19.1	15.4	47.3	-50.4344	26.1049
			17	13	22	7	8.2	10	4.8	14.2	37.2	-52.2463	20.5307
			33	33	3	14	-1.2	-1.2	16.8	9.7	24.1	-54.5965	13.3008
			12	2	38	48	10.9	18	-2.6	-9	17.3	-55.8164	9.54787
			42	4	19	43	-3.8	16.1	7	-4	15.3	-56.1752	8.44407
			47	18	39	34	-6.5	7.6	-3.1	-1.4	-3.4	-59.53	-1.87646
			37	27	24	9	-2.4	1.5	3.6	13.4	16.1	-56.0317	8.88559
			19	24	24	6	7	3.6	3.6	14.7	28.9	-53.7353	15.9499
			9	32	5	47	13.4	-0.9	15.4	-6.5	21.4	-55.0808	11.8107
			21	23	8	12	5.7	4.1	13.8	10.9	34.5	-52.7307	19.0405
			38	47	18	13	-2.6	-6.5	7.6	10	8.5	-57.3951	4.69115
			42	29	30	37	-3.8	0.7	0.2	-2.4	-5.3	-59.8708	-2.92507
			43	5	37	28	-4	15.4	-2.4	1	10	-57.126	5.519
			8	50	39	4	13.8	-12.3	-3.1	16.1	14.5	-56.3187	8.00255
			25	45	29	3	3.1	-5	0.7	16.8	15.6	-56.1214	8.60964
			18	27	25	27	7.6	1.5	3.1	1.5	13.7	-56.4622	7.56103
			30	37	38	23	0.2	-2.4	-2.6	4.1	-0.7	-59.0456	-0.38633
			35	27	34	20	-1.8	1.5	-1.4	6.4	4.7	-58.0768	2.59393
			36	42	26	43	-2	-3.8	2.5	-4	-7.3	-60.2296	-4.02887
			12	18	38	11	10.9	7.6	-2.6	11.7	27.6	-53.9686	15.2324
			50	33	5	48	-12.3	-1.2	15.4	-9	-7.1	-60.1937	-3.91849
			26	2	24	15	2.5	18	3.6	9.3	33.4	-52.928	18.4335
			31	3	19	47	-0.5	16.8	7	-6.5	16.8	-55.9061	9.27192
			20	37	36	22	6.4	-2.4	-2	4.8	6.8	-57.7001	3.75292
			26	11	31	32	2.5	11.7	-0.5	-0.9	12.8	-56.6237	7.06432
			8	22	21	23	13.8	4.8	5.7	4.1	28.4	-53.825	15.674
			18	33	6	42	7.6	-1.2	14.7	-3.8	17.3	-55.8164	9.54787
			11	28	18	35	11.7	1	7.6	-1.8	18.5	-55.6011	10.2101
			40	30	10	17	-3.3	0.2	12.2	8.2	17.3	-55.8164	9.54787
			14	37	35	34	9.7	-2.4	-1.8	-1.4	4.1	-58.1845	2.26279
			40	35	12	17	-3.3	-1.8	10.9	8.2	14	-56.4084	7.7266
			24	20	20	8	3.6	6.4	6.4	13.8	30.2	-53.5021	16.6674
			40	23	44	40	-3.3	4.1	-4.8	-3.3	-7.3	-60.2296	-4.02887
			40	3	27	32	-3.3	16.8	1.5	-0.9	14.1	-56.3905	7.78179
			24	25	22	32	3.6	3.1	4.8	-0.9	10.6	-57.0184	5.85014
			44	34	20	50	-4.8	-1.4	6.4	-12.3	-12.1	-61.0907	-6.67799
			8	48	25	13	13.8	-9	3.1	10	17.9	-55.7087	9.87901
			26	28	45	1	2.5	1	-5	19.1	17.6	-55.7626	9.71344
			30	39	36	34	0.2	-3.1	-2	-1.4	-6.3	-60.0502	-3.47697
			14	33	18	46	9.7	-1.2	7.6	-5.9	10.2	-57.0901	5.62938
			5	32	22	25	15.4	-0.9	4.8	3.1	22.4	-54.9014	12.3626
			39	50	31	19	-3.1	-12.3	-0.5	7	-8.9	-60.5167	-4.91191
			42	23	15	4	-3.8	4.1	9.3	16.1	25.7	-54.3094	14.1838
			8	11	9	47	13.8	11.7	13.4	-6.5	32.4	-53.1074	17.8816
			23	36	40	16	4.1	-2	-3.3	8.9	7.7	-57.5386	4.24963
			2	12	6	2	18	10.9	14.7	18	61.6	-47.869	33.997
			18	42	31	15	7.6	-3.8	-0.5	9.3	12.6	-56.6596	6.95394
			30	45	21	25	0.2	-5	5.7	3.1	4	-58.2024	2.2076
			43	33	41	13	-4	-1.2	-3.7	10	1.1	-58.7227	0.60709
			25	37	15	40	3.1	-2.4	9.3	-3.3	6.7	-57.718	3.69773
			45	23	48	41	-5	4.1	-9	-3.7	-13.6	-61.3598	-7.50584
			37	31	24	1	-2.4	-0.5	3.6	19.1	19.8	-55.3679	10.9276
			48	5	48	37	-9	15.4	-9	-2.4	-5	-59.817	-2.7595
			20	25	33	2	6.4	3.1	-1.2	18	26.3	-54.2018	14.515
			8	19	7	31	13.8	7	14.2	-0.5	34.5	-52.7307	19.0405
			45	39	13	44	-5	-3.1	10	-4.8	-2.9	-59.4403	-1.60051
			36	27	30	26	-2	1.5	0.2	2.5	2.2	-58.5253	1.21418
			10	49	40	32	12.2	-11.2	-3.3	-0.9	-3.2	-59.4941	-1.76608
			27	12	23	38	1.5	10.9	4.1	-2.6	13.9	-56.4263	7.67141
			22	24	33	2	4.8	3.6	-1.2	18	25.2	-54.3991	13.9079
			45	35	15	49	-5	-1.8	9.3	-11.2	-8.7	-60.4808	-4.80153
			15	16	15	16	9.3	8.9	9.3	8.9	36.4	-52.3898	20.0892
			36	39	31	23	-2	-3.1	-0.5	4.1	-1.5	-59.1891	-0.82785
			12	13	41	49	10.9	10	-3.7	-11.2	6	-57.8436	3.3114
			26	41	10	25	2.5	-3.7	12.2	3.1	14.1	-56.3905	7.78179
			33	7	41	17	-1.2	14.2	-3.7	8.2	17.5	-55.7805	9.65825
			2	15	24	5	18	9.3	3.6	15.4	46.3	-50.6138	25.553
			34	29	4	45	-1.4	0.7	16.1	-5	10.4	-57.0542	5.73976
			25	28	43	29	3.1	1	-4	0.7	0.8	-58.7765	0.44152
			10	29	10	46	12.2	0.7	12.2	-5.9	19.2	-55.4755	10.5965
			43	24	26	11	-4	3.6	2.5	11.7	13.8	-56.4443	7.61622
			27	45	1	8	1.5	-5	19.1	13.8	29.4	-53.6456	16.2259
			50	10	16	42	-12.3	12.2	8.9	-3.8	5	-58.023	2.7595
			18	46	29	42	7.6	-5.9	0.7	-3.8	-1.4	-59.1712	-0.77266
			10	28	11	5	12.2	1	11.7	15.4	40.3	-51.6902	22.2416
			33	18	13	17	-1.2	7.6	10	8.2	24.6	-54.5068	13.5767
			31	22	6	2	-0.5	4.8	14.7	18	37	-52.2822	20.4203
			50	31	25	20	-12.3	-0.5	3.1	6.4	-3.3	-59.512	-1.82127
			26	48	42	32	2.5	-9	-3.8	-0.9	-11.2	-60.9293	-6.18128
			49	4	42	49	-11.2	16.1	-3.8	-11.2	-10.1	-60.7319	-5.57419
			1	48	20	50	19.1	-9	6.4	-12.3	4.2	-58.1665	2.31798
			45	44	37	47	-5	-4.8	-2.4	-6.5	-18.7	-62.2748	-10.3205
			22	49	12	50	4.8	-11.2	10.9	-12.3	-7.8	-60.3193	-4.30482
			21	11	29	14	5.7	11.7	0.7	9.7	27.8	-53.9327	15.3428
			35	23	44	27	-1.8	4.1	-4.8	1.5	-1	-59.0994	-0.5519
			47	41	14	15	-6.5	-3.7	9.7	9.3	8.8	-57.3413	4.85672
			6	38	19	36	14.7	-2.6	7	-2	17.1	-55.8523	9.43749
			12	26	7	13	10.9	2.5	14.2	10	37.6	-52.1746	20.7514
			29	18	36	7	0.7	7.6	-2	14.2	20.5	-55.2423	11.3139
			43	8	10	46	-4	13.8	12.2	-5.9	16.1	-56.0317	8.88559
			15	24	42	7	9.3	3.6	-3.8	14.2	23.3	-54.74	12.8593
			45	40	5	38	-5	-3.3	15.4	-2.6	4.5	-58.1127	2.48355
			16	1	40	41	8.9	19.1	-3.3	-3.7	21	-55.1526	11.5899
			21	48	46	27	5.7	-9	-5.9	1.5	-7.7	-60.3014	-4.24963
			47	35	34	42	-6.5	-1.8	-1.4	-3.8	-13.5	-61.3419	-7.45065
			45	19	13	9	-5	7	10	13.4	25.4	-54.3632	14.0183
			20	20	19	34	6.4	6.4	7	-1.4	18.4	-55.619	10.155
			33	3	11	31	-1.2	16.8	11.7	-0.5	26.8	-54.1121	14.7909
			26	40	33	4	2.5	-3.3	-1.2	16.1	14.1	-56.3905	7.78179
			22	10	30	8	4.8	12.2	0.2	13.8	31	-53.3586	17.1089
			7	36	5	11	14.2	-2	15.4	11.7	39.3	-51.8696	21.6897
			36	47	14	23	-2	-6.5	9.7	4.1	5.3	-57.9692	2.92507
			21	41	36	34	5.7	-3.7	-2	-1.4	-1.4	-59.1712	-0.77266
			25	18	17	47	3.1	7.6	8.2	-6.5	12.4	-56.6954	6.84356
			11	32	20	15	11.7	-0.9	6.4	9.3	26.5	-54.1659	14.6253
			32	49	37	40	-0.9	-11.2	-2.4	-3.3	-17.8	-62.1133	-9.82382
			31	10	11	16	-0.5	12.2	11.7	8.9	32.3	-53.1254	17.8264
			32	6	35	12	-0.9	14.7	-1.8	10.9	22.9	-54.8117	12.6385
			18	49	2	2	7.6	-11.2	18	18	32.4	-53.1074	17.8816
			13	29	9	49	10	0.7	13.4	-11.2	12.9	-56.6057	7.11951
			30	1	45	25	0.2	19.1	-5	3.1	17.4	-55.7984	9.60306
			43	28	7	50	-4	1	14.2	-12.3	-1.1	-59.1173	-0.60709
			50	41	13	28	-12.3	-3.7	10	1	-5	-59.817	-2.7595
			31	44	49	3	-0.5	-4.8	-11.2	16.8	0.3	-58.8662	0.16557
			13	47	25	39	10	-6.5	3.1	-3.1	3.5	-58.2921	1.93165
			21	45	32	17	5.7	-5	-0.9	8.2	8	-57.4848	4.4152
			19	31	31	28	7	-0.5	-0.5	1	7	-57.6642	3.8633
			44	37	10	18	-4.8	-2.4	12.2	7.6	12.6	-56.6596	6.95394
			14	22	5	28	9.7	4.8	15.4	1	30.9	-53.3765	17.0537
			31	30	1	36	-0.5	0.2	19.1	-2	16.8	-55.9061	9.27192
			9	17	15	15	13.4	8.2	9.3	9.3	40.2	-51.7081	22.1864
			35	24	10	30	-1.8	3.6	12.2	0.2	14.2	-56.3725	7.83698
			8	16	17	35	13.8	8.9	8.2	-1.8	29.1	-53.6995	16.0603
			39	17	50	44	-3.1	8.2	-12.3	-4.8	-12	-61.0728	-6.6228
			2	15	1	21	18	9.3	19.1	5.7	52.1	-49.5733	28.754
			36	34	7	20	-2	-1.4	14.2	6.4	17.2	-55.8343	9.49268
			44	4	28	10	-4.8	16.1	1	12.2	24.5	-54.5247	13.5215
			13	14	37	18	10	9.7	-2.4	7.6	24.9	-54.4529	13.7423
			8	36	26	31	13.8	-2	2.5	-0.5	13.8	-56.4443	7.61622
			37	3	5	34	-2.4	16.8	15.4	-1.4	28.4	-53.825	15.674
			44	30	28	8	-4.8	0.2	1	13.8	10.2	-57.0901	5.62938
			45	49	36	28	-5	-11.2	-2	1	-17.2	-62.0057	-9.49268
			22	20	35	20	4.8	6.4	-1.8	6.4	15.8	-56.0855	8.72002
			26	9	22	27	2.5	13.4	4.8	1.5	22.2	-54.9373	12.2522
			4	24	31	22	16.1	3.6	-0.5	4.8	24	-54.6144	13.2456
			1	27	49	9	19.1	1.5	-11.2	13.4	22.8	-54.8297	12.5833
			24	1	28	19	3.6	19.1	1	7	30.7	-53.4124	16.9433
			50	30	6	15	-12.3	0.2	14.7	9.3	11.9	-56.7851	6.56761
			44	21	23	34	-4.8	5.7	4.1	-1.4	3.6	-58.2742	1.98684
			23	15	16	1	4.1	9.3	8.9	19.1	41.4	-51.4928	22.8487
			48	50	36	33	-9	-12.3	-2	-1.2	-24.5	-63.3153	-13.5215
			42	11	21	9	-3.8	11.7	5.7	13.4	27	-54.0762	14.9013
			29	2	28	19	0.7	18	1	7	26.7	-54.13	14.7357
			41	15	46	37	-3.7	9.3	-5.9	-2.4	-2.7	-59.4044	-1.49013
			34	12	36	26	-1.4	10.9	-2	2.5	10	-57.126	5.519
			30	45	6	1	0.2	-5	14.7	19.1	29	-53.7174	16.0051
			27	17	19	46	1.5	8.2	7	-5.9	10.8	-56.9825	5.96052
			36	28	16	4	-2	1	8.9	16.1	24	-54.6144	13.2456
			45	40	29	24	-5	-3.3	0.7	3.6	-4	-59.6376	-2.2076
			16	45	10	39	8.9	-5	12.2	-3.1	13	-56.5878	7.1747
			4	27	33	10	16.1	1.5	-1.2	12.2	28.6	-53.7892	15.7843
			15	4	26	19	9.3	16.1	2.5	7	34.9	-52.6589	19.2613
			41	9	40	18	-3.7	13.4	-3.3	7.6	14	-56.4084	7.7266
			25	30	13	46	3.1	0.2	10	-5.9	7.4	-57.5924	4.08406
			29	46	30	46	0.7	-5.9	0.2	-5.9	-10.9	-60.8755	-6.01571
			19	27	30	20	7	1.5	0.2	6.4	15.1	-56.2111	8.33369
			16	46	20	29	8.9	-5.9	6.4	0.7	10.1	-57.1081	5.57419
			35	5	14	11	-1.8	15.4	9.7	11.7	35	-52.641	19.3165
			13	37	30	21	10	-2.4	0.2	5.7	13.5	-56.4981	7.45065
			37	44	30	27	-2.4	-4.8	0.2	1.5	-5.5	-59.9067	-3.03545
			3	7	33	26	16.8	14.2	-1.2	2.5	32.3	-53.1254	17.8264
			8	14	13	6	13.8	9.7	10	14.7	48.2	-50.2729	26.6016
			50	42	25	39	-12.3	-3.8	3.1	-3.1	-16.1	-61.8083	-8.88559
			6	33	15	13	14.7	-1.2	9.3	10	32.8	-53.0357	18.1023
			37	5	49	16	-2.4	15.4	-11.2	8.9	10.7	-57.0004	5.90533
			12	38	11	50	10.9	-2.6	11.7	-12.3	7.7	-57.5386	4.24963
			42	26	32	1	-3.8	2.5	-0.9	19.1	16.9	-55.8881	9.32711
			41	35	4	18	-3.7	-1.8	16.1	7.6	18.2	-55.6549	10.0446
			24	39	22	26	3.6	-3.1	4.8	2.5	7.8	-57.5207	4.30482
			2	15	15	44	18	9.3	9.3	-4.8	31.8	-53.2151	17.5504
			28	45	39	26	1	-5	-3.1	2.5	-4.6	-59.7452	-2.53874
			39	8	4	32	-3.1	13.8	16.1	-0.9	25.9	-54.2735	14.2942
			45	30	31	41	-5	0.2	-0.5	-3.7	-9	-60.5346	-4.9671
			49	10	6	18	-11.2	12.2	14.7	7.6	23.3	-54.74	12.8593
			31	8	34	48	-0.5	13.8	-1.4	-9	2.9	-58.3997	1.60051
			17	32	38	36	8.2	-0.9	-2.6	-2	2.7	-58.4356	1.49013
			7	47	23	6	14.2	-6.5	4.1	14.7	26.5	-54.1659	14.6253
			17	16	21	8	8.2	8.9	5.7	13.8	36.6	-52.354	20.1995
			13	8	43	21	10	13.8	-4	5.7	25.5	-54.3453	14.0734
			42	40	3	3	-3.8	-3.3	16.8	16.8	26.5	-54.1659	14.6253
			15	21	47	3	9.3	5.7	-6.5	16.8	25.3	-54.3812	13.9631
			12	28	24	33	10.9	1	3.6	-1.2	14.3	-56.3546	7.89217
			41	33	5	33	-3.7	-1.2	15.4	-1.2	9.3	-57.2516	5.13267
			24	27	32	48	3.6	1.5	-0.9	-9	-4.8	-59.7811	-2.64912
			25	15	19	28	3.1	9.3	7	1	20.4	-55.2602	11.2588
			29	19	33	22	0.7	7	-1.2	4.8	11.3	-56.8928	6.23647
			24	39	19	24	3.6	-3.1	7	3.6	11.1	-56.9287	6.12609
			1	50	14	36	19.1	-12.3	9.7	-2	14.5	-56.3187	8.00255
			6	26	14	49	14.7	2.5	9.7	-11.2	15.7	-56.1034	8.66483
			3	9	35	50	16.8	13.4	-1.8	-12.3	16.1	-56.0317	8.88559
			47	24	25	40	-6.5	3.6	3.1	-3.3	-3.1	-59.4761	-1.71089
			1	30	23	3	19.1	0.2	4.1	16.8	40.2	-51.7081	22.1864
			35	26	7	39	-1.8	2.5	14.2	-3.1	11.8	-56.8031	6.51242
			26	33	11	39	2.5	-1.2	11.7	-3.1	9.9	-57.1439	5.46381
			38	17	3	16	-2.6	8.2	16.8	8.9	31.3	-53.3048	17.2745
			31	25	23	23	-0.5	3.1	4.1	4.1	10.8	-56.9825	5.96052
			32	1	19	43	-0.9	19.1	7	-4	21.2	-55.1167	11.7003
			38	24	27	14	-2.6	3.6	1.5	9.7	12.2	-56.7313	6.73318
			49	41	8	47	-11.2	-3.7	13.8	-6.5	-7.6	-60.2834	-4.19444
			34	45	13	14	-1.4	-5	10	9.7	13.3	-56.534	7.34027
			22	12	25	8	4.8	10.9	3.1	13.8	32.6	-53.0716	17.9919
			31	21	33	1	-0.5	5.7	-1.2	19.1	23.1	-54.7759	12.7489
			2	50	26	14	18	-12.3	2.5	9.7	17.9	-55.7087	9.87901
			16	42	10	23	8.9	-3.8	12.2	4.1	21.4	-55.0808	11.8107
			3	28	45	6	16.8	1	-5	14.7	27.5	-53.9865	15.1772
			37	10	25	7	-2.4	12.2	3.1	14.2	27.1	-54.0583	14.9565
			34	45	42	31	-1.4	-5	-3.8	-0.5	-10.7	-60.8396	-5.90533
			46	40	16	23	-5.9	-3.3	8.9	4.1	3.8	-58.2383	2.09722
			44	29	32	30	-4.8	0.7	-0.9	0.2	-4.8	-59.7811	-2.64912
			38	15	35	10	-2.6	9.3	-1.8	12.2	17.1	-55.8523	9.43749
			1	32	38	40	19.1	-0.9	-2.6	-3.3	12.3	-56.7134	6.78837
			46	16	9	24	-5.9	8.9	13.4	3.6	20	-55.332	11.038
			40	13	41	18	-3.3	10	-3.7	7.6	10.6	-57.0184	5.85014
			47	43	24	32	-6.5	-4	3.6	-0.9	-7.8	-60.3193	-4.30482
			36	3	17	47	-2	16.8	8.2	-6.5	16.5	-55.9599	9.10635
			13	11	13	16	10	11.7	10	8.9	40.6	-51.6364	22.4071
			14	39	33	20	9.7	-3.1	-1.2	6.4	11.8	-56.8031	6.51242
			3	3	29	5	16.8	16.8	0.7	15.4	49.7	-50.0038	27.4294
			29	22	31	42	0.7	4.8	-0.5	-3.8	1.2	-58.7047	0.66228
			28	22	45	7	1	4.8	-5	14.2	15	-56.229	8.2785
			6	34	42	22	14.7	-1.4	-3.8	4.8	14.3	-56.3546	7.89217
			42	34	2	47	-3.8	-1.4	18	-6.5	6.3	-57.7898	3.47697
			46	50	41	6	-5.9	-12.3	-3.7	14.7	-7.2	-60.2117	-3.97368
			40	45	21	45	-3.3	-5	5.7	-5	-7.6	-60.2834	-4.19444
			33	12	48	45	-1.2	10.9	-9	-5	-4.3	-59.6914	-2.37317
			33	5	50	50	-1.2	15.4	-12.3	-12.3	-10.4	-60.7858	-5.73976
			46	30	6	11	-5.9	0.2	14.7	11.7	20.7	-55.2064	11.4243
			18	7	31	48	7.6	14.2	-0.5	-9	12.3	-56.7134	6.78837
			49	39	49	34	-11.2	-3.1	-11.2	-1.4	-26.9	-63.7459	-14.8461
			27	38	16	46	1.5	-2.6	8.9	-5.9	1.9	-58.5791	1.04861
			3	32	25	43	16.8	-0.9	3.1	-4	15	-56.229	8.2785
			48	17	23	9	-9	8.2	4.1	13.4	16.7	-55.924	9.21673
			24	41	8	14	3.6	-3.7	13.8	9.7	23.4	-54.722	12.9145
			20	7	37	38	6.4	14.2	-2.4	-2.6	15.6	-56.1214	8.60964
			19	39	50	19	7	-3.1	-12.3	7	-1.4	-59.1712	-0.77266
			39	12	6	35	-3.1	10.9	14.7	-1.8	20.7	-55.2064	11.4243
			14	19	16	38	9.7	7	8.9	-2.6	23	-54.7938	12.6937
			8	35	44	12	13.8	-1.8	-4.8	10.9	18.1	-55.6729	9.98939
			26	1	17	1	2.5	19.1	8.2	19.1	48.9	-50.1473	26.9879
			35	32	17	41	-1.8	-0.9	8.2	-3.7	1.8	-58.5971	0.99342
			42	27	22	1	-3.8	1.5	4.8	19.1	21.6	-55.045	11.921
			47	48	43	22	-6.5	-9	-4	4.8	-14.7	-61.5572	-8.11293
			38	28	43	42	-2.6	1	-4	-3.8	-9.4	-60.6064	-5.18786
			26	8	13	40	2.5	13.8	10	-3.3	23	-54.7938	12.6937
			18	34	8	20	7.6	-1.4	13.8	6.4	26.4	-54.1838	14.5702
			3	1	18	50	16.8	19.1	7.6	-12.3	31.2	-53.3227	17.2193
			24	13	21	42	3.6	10	5.7	-3.8	15.5	-56.1393	8.55445
			2	23	32	17	18	4.1	-0.9	8.2	29.4	-53.6456	16.2259
			12	14	10	43	10.9	9.7	12.2	-4	28.8	-53.7533	15.8947
			17	47	20	22	8.2	-6.5	6.4	4.8	12.9	-56.6057	7.11951
			10	29	37	7	12.2	0.7	-2.4	14.2	24.7	-54.4888	13.6319
			12	1	5	23	10.9	19.1	15.4	4.1	49.5	-50.0397	27.319
			34	3	20	6	-1.4	16.8	6.4	14.7	36.5	-52.3719	20.1443
			11	20	10	40	11.7	6.4	12.2	-3.3	27	-54.0762	14.9013
			35	27	20	17	-1.8	1.5	6.4	8.2	14.3	-56.3546	7.89217
			32	22	24	38	-0.9	4.8	3.6	-2.6	4.9	-58.0409	2.70431
			23	46	45	12	4.1	-5.9	-5	10.9	4.1	-58.1845	2.26279
			7	12	43	50	14.2	10.9	-4	-12.3	8.8	-57.3413	4.85672
			50	15	28	3	-12.3	9.3	1	16.8	14.8	-56.2649	8.16812
			37	31	5	34	-2.4	-0.5	15.4	-1.4	11.1	-56.9287	6.12609
			6	15	20	20	14.7	9.3	6.4	6.4	36.8	-52.3181	20.3099
			42	25	15	40	-3.8	3.1	9.3	-3.3	5.3	-57.9692	2.92507
			3	12	27	23	16.8	10.9	1.5	4.1	33.3	-52.946	18.3783
			14	18	32	48	9.7	7.6	-0.9	-9	7.4	-57.5924	4.08406
			4	21	17	32	16.1	5.7	8.2	-0.9	29.1	-53.6995	16.0603
			28	8	19	41	1	13.8	7	-3.7	18.1	-55.6729	9.98939
			44	35	21	32	-4.8	-1.8	5.7	-0.9	-1.8	-59.2429	-0.99342
			31	22	36	13	-0.5	4.8	-2	10	12.3	-56.7134	6.78837
			1	40	39	3	19.1	-3.3	-3.1	16.8	29.5	-53.6277	16.281
			9	36	46	1	13.4	-2	-5.9	19.1	24.6	-54.5068	13.5767
			30	31	17	3	0.2	-0.5	8.2	16.8	24.7	-54.4888	13.6319
			49	30	36	25	-11.2	0.2	-2	3.1	-9.9	-60.6961	-5.46381
			4	34	43	1	16.1	-1.4	-4	19.1	29.8	-53.5739	16.4466
			43	42	25	39	-4	-3.8	3.1	-3.1	-7.8	-60.3193	-4.30482
			21	12	27	12	5.7	10.9	1.5	10.9	29	-53.7174	16.0051
			19	47	24	10	7	-6.5	3.6	12.2	16.3	-55.9958	8.99597
			32	9	29	15	-0.9	13.4	0.7	9.3	22.5	-54.8835	12.4177
			1	28	29	49	19.1	1	0.7	-11.2	9.6	-57.1978	5.29824
			25	19	4	47	3.1	7	16.1	-6.5	19.7	-55.3858	10.8724
			13	11	36	47	10	11.7	-2	-6.5	13.2	-56.5519	7.28508
			31	3	50	27	-0.5	16.8	-12.3	1.5	5.5	-57.9333	3.03545
			13	12	50	28	10	10.9	-12.3	1	9.6	-57.1978	5.29824
			25	3	28	17	3.1	16.8	1	8.2	29.1	-53.6995	16.0603
			32	12	3	50	-0.9	10.9	16.8	-12.3	14.5	-56.3187	8.00255
			2	37	11	10	18	-2.4	11.7	12.2	39.5	-51.8337	21.8
			24	8	39	30	3.6	13.8	-3.1	0.2	14.5	-56.3187	8.00255
			20	10	10	40	6.4	12.2	12.2	-3.3	27.5	-53.9865	15.1772
			10	16	43	50	12.2	8.9	-4	-12.3	4.8	-58.0589	2.64912
			45	3	5	17	-5	16.8	15.4	8.2	35.4	-52.5692	19.5373
			5	48	32	6	15.4	-9	-0.9	14.7	20.2	-55.2961	11.1484
			38	31	40	50	-2.6	-0.5	-3.3	-12.3	-18.7	-62.2748	-10.3205
			11	41	19	50	11.7	-3.7	7	-12.3	2.7	-58.4356	1.49013
			40	34	3	33	-3.3	-1.4	16.8	-1.2	10.9	-56.9645	6.01571
			20	12	48	11	6.4	10.9	-9	11.7	20	-55.332	11.038
			40	3	23	17	-3.3	16.8	4.1	8.2	25.8	-54.2915	14.239
			33	30	19	39	-1.2	0.2	7	-3.1	2.9	-58.3997	1.60051
			45	29	31	41	-5	0.7	-0.5	-3.7	-8.5	-60.4449	-4.69115
			28	18	46	48	1	7.6	-5.9	-9	-6.3	-60.0502	-3.47697
			45	41	22	37	-5	-3.7	4.8	-2.4	-6.3	-60.0502	-3.47697
			5	34	31	20	15.4	-1.4	-0.5	6.4	19.9	-55.3499	10.9828
			41	49	46	18	-3.7	-11.2	-5.9	7.6	-13.2	-61.2881	-7.28508
			31	43	38	50	-0.5	-4	-2.6	-12.3	-19.4	-62.4004	-10.7069
			24	4	22	32	3.6	16.1	4.8	-0.9	23.6	-54.6862	13.0248
			11	8	2	21	11.7	13.8	18	5.7	49.2	-50.0935	27.1535
			1	19	25	10	19.1	7	3.1	12.2	41.4	-51.4928	22.8487
			11	36	37	39	11.7	-2	-2.4	-3.1	4.2	-58.1665	2.31798
			10	24	32	38	12.2	3.6	-0.9	-2.6	12.3	-56.7134	6.78837
			26	26	47	45	2.5	2.5	-6.5	-5	-6.5	-60.0861	-3.58735
			44	19	27	14	-4.8	7	1.5	9.7	13.4	-56.516	7.39546
			6	18	19	28	14.7	7.6	7	1	30.3	-53.4842	16.7226
			20	25	35	32	6.4	3.1	-1.8	-0.9	6.8	-57.7001	3.75292
			14	3	21	18	9.7	16.8	5.7	7.6	39.8	-51.7799	21.9656
			31	42	29	46	-0.5	-3.8	0.7	-5.9	-9.5	-60.6243	-5.24305
			9	9	39	45	13.4	13.4	-3.1	-5	18.7	-55.5652	10.3205
			7	12	44	43	14.2	10.9	-4.8	-4	16.3	-55.9958	8.99597
			47	10	12	8	-6.5	12.2	10.9	13.8	30.4	-53.4662	16.7778
			37	1	19	27	-2.4	19.1	7	1.5	25.2	-54.3991	13.9079
			40	30	26	38	-3.3	0.2	2.5	-2.6	-3.2	-59.4941	-1.76608
			16	1	31	8	8.9	19.1	-0.5	13.8	41.3	-51.5108	22.7935
			36	48	25	34	-2	-9	3.1	-1.4	-9.3	-60.5884	-5.13267
			48	39	4	33	-9	-3.1	16.1	-1.2	2.8	-58.4177	1.54532
			45	35	35	48	-5	-1.8	-1.8	-9	-17.6	-62.0774	-9.71344
			11	35	22	30	11.7	-1.8	4.8	0.2	14.9	-56.2469	8.22331
			19	1	30	31	7	19.1	0.2	-0.5	25.8	-54.2915	14.239
			45	36	35	14	-5	-2	-1.8	9.7	0.9	-58.7585	0.49671
			45	1	9	21	-5	19.1	13.4	5.7	33.2	-52.9639	18.3231
			16	31	26	6	8.9	-0.5	2.5	14.7	25.6	-54.3274	14.1286
			19	20	7	41	7	6.4	14.2	-3.7	23.9	-54.6323	13.1904
			22	4	28	46	4.8	16.1	1	-5.9	16	-56.0496	8.8304
			5	15	31	41	15.4	9.3	-0.5	-3.7	20.5	-55.2423	11.314
			16	12	26	49	8.9	10.9	2.5	-11.2	11.1	-56.9287	6.12609
			12	19	33	18	10.9	7	-1.2	7.6	24.3	-54.5606	13.4112
			1	30	46	11	19.1	0.2	-5.9	11.7	25.1	-54.4171	13.8527
			50	6	6	47	-12.3	14.7	14.7	-6.5	10.6	-57.0184	5.85014
			13	32	35	45	10	-0.9	-1.8	-5	2.3	-58.5074	1.26937
			3	8	18	23	16.8	13.8	7.6	4.1	42.3	-51.3314	23.3454
			35	21	14	20	-1.8	5.7	9.7	6.4	20	-55.332	11.038
			29	40	8	39	0.7	-3.3	13.8	-3.1	8.1	-57.4669	4.47039
			46	28	37	19	-5.9	1	-2.4	7	-0.3	-58.9738	-0.16557
			36	48	43	4	-2	-9	-4	16.1	1.1	-58.7227	0.60709
			10	46	10	32	12.2	-5.9	12.2	-0.9	17.6	-55.7626	9.71344
			38	15	18	3	-2.6	9.3	7.6	16.8	31.1	-53.3407	17.1641
			13	50	34	38	10	-12.3	-1.4	-2.6	-6.3	-60.0502	-3.47697
			24	28	6	43	3.6	1	14.7	-4	15.3	-56.1752	8.44407
			8	13	43	24	13.8	10	-4	3.6	23.4	-54.722	12.9145
			11	20	11	25	11.7	6.4	11.7	3.1	32.9	-53.0177	18.1575
			40	18	41	16	-3.3	7.6	-3.7	8.9	9.5	-57.2157	5.24305
			11	14	39	9	11.7	9.7	-3.1	13.4	31.7	-53.233	17.4952
			25	21	26	34	3.1	5.7	2.5	-1.4	9.9	-57.1439	5.46381
			43	17	34	26	-4	8.2	-1.4	2.5	5.3	-57.9692	2.92507
			6	22	43	24	14.7	4.8	-4	3.6	19.1	-55.4935	10.5413
			1	39	28	36	19.1	-3.1	1	-2	15	-56.229	8.2785
			7	30	35	15	14.2	0.2	-1.8	9.3	21.9	-54.9911	12.0866
			42	22	22	49	-3.8	4.8	4.8	-11.2	-5.4	-59.8888	-2.98026
			6	19	48	25	14.7	7	-9	3.1	15.8	-56.0855	8.72002
			1	16	48	35	19.1	8.9	-9	-1.8	17.2	-55.8343	9.49268
			31	3	45	3	-0.5	16.8	-5	16.8	28.1	-53.8789	15.5084
			4	25	46	16	16.1	3.1	-5.9	8.9	22.2	-54.9373	12.2522
			36	46	33	5	-2	-5.9	-1.2	15.4	6.3	-57.7898	3.47697
			34	24	40	29	-1.4	3.6	-3.3	0.7	-0.4	-58.9918	-0.22076
			14	48	37	22	9.7	-9	-2.4	4.8	3.1	-58.3639	1.71089
			5	33	42	49	15.4	-1.2	-3.8	-11.2	-0.8	-59.0635	-0.44152
			28	36	17	14	1	-2	8.2	9.7	16.9	-55.8881	9.32711
			18	34	35	10	7.6	-1.4	-1.8	12.2	16.6	-55.942	9.16154
			3	7	32	49	16.8	14.2	-0.9	-11.2	18.9	-55.5293	10.4309
			49	30	35	30	-11.2	0.2	-1.8	0.2	-12.6	-61.1804	-6.95394
			47	19	1	20	-6.5	7	19.1	6.4	26	-54.2556	14.3494
			42	41	45	34	-3.8	-3.7	-5	-1.4	-13.9	-61.4137	-7.67141
			20	45	7	12	6.4	-5	14.2	10.9	26.5	-54.1659	14.6253
			19	4	6	12	7	16.1	14.7	10.9	48.7	-50.1832	26.8775
			14	5	18	40	9.7	15.4	7.6	-3.3	29.4	-53.6456	16.2259
			15	14	39	3	9.3	9.7	-3.1	16.8	32.7	-53.0536	18.0471
			2	37	16	22	18	-2.4	8.9	4.8	29.3	-53.6636	16.1707
			17	46	17	47	8.2	-5.9	8.2	-6.5	4	-58.2024	2.2076
			17	50	47	39	8.2	-12.3	-6.5	-3.1	-13.7	-61.3778	-7.56103
			21	23	34	6	5.7	4.1	-1.4	14.7	23.1	-54.7759	12.7489
			9	8	38	12	13.4	13.8	-2.6	10.9	35.5	-52.5513	19.5924
			18	40	6	43	7.6	-3.3	14.7	-4	15	-56.229	8.2785
			35	18	19	43	-1.8	7.6	7	-4	8.8	-57.3413	4.85672
			12	45	10	41	10.9	-5	12.2	-3.7	14.4	-56.3366	7.94736
			15	29	11	47	9.3	0.7	11.7	-6.5	15.2	-56.1931	8.38888
			48	5	37	7	-9	15.4	-2.4	14.2	18.2	-55.6549	10.0446
			32	5	24	20	-0.9	15.4	3.6	6.4	24.5	-54.5247	13.5215
			9	19	22	25	13.4	7	4.8	3.1	28.3	-53.843	15.6188
			7	47	1	15	14.2	-6.5	19.1	9.3	36.1	-52.4437	19.9236
			6	46	15	3	14.7	-5.9	9.3	16.8	34.9	-52.6589	19.2613
			6	39	22	40	14.7	-3.1	4.8	-3.3	13.1	-56.5699	7.22989
			32	9	14	34	-0.9	13.4	9.7	-1.4	20.8	-55.1885	11.4795
			40	42	19	25	-3.3	-3.8	7	3.1	3	-58.3818	1.6557
			25	41	13	40	3.1	-3.7	10	-3.3	6.1	-57.8257	3.36659
			5	10	46	6	15.4	12.2	-5.9	14.7	36.4	-52.3898	20.0892
			31	14	46	40	-0.5	9.7	-5.9	-3.3	0	-58.92	0
			36	9	41	5	-2	13.4	-3.7	15.4	23.1	-54.7759	12.7489
			25	50	18	1	3.1	-12.3	7.6	19.1	17.5	-55.7805	9.65825
			37	9	48	3	-2.4	13.4	-9	16.8	18.8	-55.5473	10.3757
			4	40	41	29	16.1	-3.3	-3.7	0.7	9.8	-57.1619	5.40862
			42	50	5	44	-3.8	-12.3	15.4	-4.8	-5.5	-59.9067	-3.03545
			37	41	16	30	-2.4	-3.7	8.9	0.2	3	-58.3818	1.6557
			39	27	8	11	-3.1	1.5	13.8	11.7	23.9	-54.6323	13.1904
			47	22	39	7	-6.5	4.8	-3.1	14.2	9.4	-57.2336	5.18786
			38	33	30	37	-2.6	-1.2	0.2	-2.4	-6	-59.9964	-3.3114
			18	6	24	39	7.6	14.7	3.6	-3.1	22.8	-54.8297	12.5833
			17	5	49	27	8.2	15.4	-11.2	1.5	13.9	-56.4263	7.67141
			36	47	18	43	-2	-6.5	7.6	-4	-4.9	-59.7991	-2.70431
			12	41	21	19	10.9	-3.7	5.7	7	19.9	-55.3499	10.9828
			47	44	25	25	-6.5	-4.8	3.1	3.1	-5.1	-59.8349	-2.81469
			27	36	44	3	1.5	-2	-4.8	16.8	11.5	-56.8569	6.34685
			3	1	40	32	16.8	19.1	-3.3	-0.9	31.7	-53.233	17.4952
			38	5	11	40	-2.6	15.4	11.7	-3.3	21.2	-55.1167	11.7003
			25	19	37	36	3.1	7	-2.4	-2	5.7	-57.8974	3.14583
			30	36	4	47	0.2	-2	16.1	-6.5	7.8	-57.5207	4.30482
			46	35	36	30	-5.9	-1.8	-2	0.2	-9.5	-60.6243	-5.24305
			43	34	50	8	-4	-1.4	-12.3	13.8	-3.9	-59.6197	-2.15241
			46	50	38	35	-5.9	-12.3	-2.6	-1.8	-22.6	-62.9744	-12.4729
			21	5	43	8	5.7	15.4	-4	13.8	30.9	-53.3765	17.0537
			39	17	23	38	-3.1	8.2	4.1	-2.6	6.6	-57.736	3.64254
			23	22	1	24	4.1	4.8	19.1	3.6	31.6	-53.251	17.44
			35	43	8	2	-1.8	-4	13.8	18	26	-54.2556	14.3494
			45	33	28	39	-5	-1.2	1	-3.1	-8.3	-60.409	-4.58077
			10	28	44	37	12.2	1	-4.8	-2.4	6	-57.8436	3.3114
			14	10	46	44	9.7	12.2	-5.9	-4.8	11.2	-56.9107	6.18128
			20	32	17	16	6.4	-0.9	8.2	8.9	22.6	-54.8656	12.4729
			39	49	43	30	-3.1	-11.2	-4	0.2	-18.1	-62.1671	-9.98939
			45	31	12	17	-5	-0.5	10.9	8.2	13.6	-56.4802	7.50584
			17	29	46	32	8.2	0.7	-5.9	-0.9	2.1	-58.5433	1.15899
			14	47	5	33	9.7	-6.5	15.4	-1.2	17.4	-55.7984	9.60306
			9	45	17	12	13.4	-5	8.2	10.9	27.5	-53.9865	15.1772
			15	6	15	16	9.3	14.7	9.3	8.9	42.2	-51.3493	23.2902
			47	28	12	46	-6.5	1	10.9	-5.9	-0.5	-59.0097	-0.27595
			49	35	4	26	-11.2	-1.8	16.1	2.5	5.6	-57.9154	3.09064
			49	33	43	39	-11.2	-1.2	-4	-3.1	-19.5	-62.4183	-10.762
			25	16	4	15	3.1	8.9	16.1	9.3	37.4	-52.2104	20.6411
			26	43	19	30	2.5	-4	7	0.2	5.7	-57.8974	3.14583
			5	28	9	16	15.4	1	13.4	8.9	38.7	-51.9772	21.3585
			39	32	13	34	-3.1	-0.9	10	-1.4	4.6	-58.0948	2.53874
			4	17	1	33	16.1	8.2	19.1	-1.2	42.2	-51.3493	23.2902
			35	28	9	46	-1.8	1	13.4	-5.9	6.7	-57.718	3.69773
			23	36	27	24	4.1	-2	1.5	3.6	7.2	-57.6283	3.97368
			15	19	23	42	9.3	7	4.1	-3.8	16.6	-55.942	9.16154
			23	27	41	2	4.1	1.5	-3.7	18	19.9	-55.3499	10.9828
			31	11	27	17	-0.5	11.7	1.5	8.2	20.9	-55.1705	11.5347
			6	38	16	28	14.7	-2.6	8.9	1	22	-54.9732	12.1418
			30	27	3	5	0.2	1.5	16.8	15.4	33.9	-52.8383	18.7094
			6	38	26	6	14.7	-2.6	2.5	14.7	29.3	-53.6636	16.1707
			50	30	21	30	-12.3	0.2	5.7	0.2	-6.2	-60.0323	-3.42178
			29	18	36	48	0.7	7.6	-2	-9	-2.7	-59.4044	-1.49013
			50	14	46	5	-12.3	9.7	-5.9	15.4	6.9	-57.6821	3.80811
			44	2	20	28	-4.8	18	6.4	1	20.6	-55.2244	11.3691
			39	4	19	35	-3.1	16.1	7	-1.8	18.2	-55.6549	10.0446
			1	4	9	47	19.1	16.1	13.4	-6.5	42.1	-51.3673	23.235
			17	21	18	33	8.2	5.7	7.6	-1.2	20.3	-55.2782	11.2036
			32	25	28	9	-0.9	3.1	1	13.4	16.6	-55.942	9.16154
			12	29	45	5	10.9	0.7	-5	15.4	22	-54.9732	12.1418
			28	18	13	9	1	7.6	10	13.4	32	-53.1792	17.6608
			7	1	44	2	14.2	19.1	-4.8	18	46.5	-50.5779	25.6633
			32	37	13	32	-0.9	-2.4	10	-0.9	5.8	-57.8795	3.20102
			46	23	19	36	-5.9	4.1	7	-2	3.2	-58.3459	1.76608
			23	48	46	46	4.1	-9	-5.9	-5.9	-16.7	-61.916	-9.21673
			20	21	46	39	6.4	5.7	-5.9	-3.1	3.1	-58.3639	1.71089
			42	13	20	13	-3.8	10	6.4	10	22.6	-54.8656	12.4729
			8	18	13	29	13.8	7.6	10	0.7	32.1	-53.1613	17.716
			50	12	23	18	-12.3	10.9	4.1	7.6	10.3	-57.0722	5.68457
			43	4	31	16	-4	16.1	-0.5	8.9	20.5	-55.2423	11.3139
			5	31	44	13	15.4	-0.5	-4.8	10	20.1	-55.3141	11.0932
			35	19	1	34	-1.8	7	19.1	-1.4	22.9	-54.8117	12.6385
			20	47	23	42	6.4	-6.5	4.1	-3.8	0.2	-58.8841	0.11038
			7	34	27	19	14.2	-1.4	1.5	7	21.3	-55.0988	11.7555
			12	12	28	34	10.9	10.9	1	-1.4	21.4	-55.0808	11.8107
			43	7	22	26	-4	14.2	4.8	2.5	17.5	-55.7805	9.65825
			37	47	44	22	-2.4	-6.5	-4.8	4.8	-8.9	-60.5167	-4.91191
			20	40	24	23	6.4	-3.3	3.6	4.1	10.8	-56.9825	5.96052
			49	11	12	17	-11.2	11.7	10.9	8.2	19.6	-55.4038	10.8172
			42	1	32	15	-3.8	19.1	-0.9	9.3	23.7	-54.6682	13.08
			20	40	39	3	6.4	-3.3	-3.1	16.8	16.8	-55.9061	9.27192
			29	46	20	46	0.7	-5.9	6.4	-5.9	-4.7	-59.7632	-2.59393
			22	17	50	4	4.8	8.2	-12.3	16.1	16.8	-55.9061	9.27192
			47	4	2	37	-6.5	16.1	18	-2.4	25.2	-54.3991	13.9079
			28	13	40	1	1	10	-3.3	19.1	26.8	-54.1121	14.7909
			21	29	11	32	5.7	0.7	11.7	-0.9	17.2	-55.8343	9.49268
			41	20	42	46	-3.7	6.4	-3.8	-5.9	-7	-60.1758	-3.8633
			42	3	13	16	-3.8	16.8	10	8.9	31.9	-53.1971	17.6056
			47	2	50	6	-6.5	18	-12.3	14.7	13.9	-56.4263	7.67141
			6	41	28	12	14.7	-3.7	1	10.9	22.9	-54.8117	12.6385
			49	38	8	3	-11.2	-2.6	13.8	16.8	16.8	-55.9061	9.27192
			15	4	48	3	9.3	16.1	-9	16.8	33.2	-52.9639	18.3231
			19	34	12	24	7	-1.4	10.9	3.6	20.1	-55.3141	11.0932
			28	29	29	23	1	0.7	0.7	4.1	6.5	-57.7539	3.58735
			39	25	19	11	-3.1	3.1	7	11.7	18.7	-55.5652	10.3205
			17	12	9	37	8.2	10.9	13.4	-2.4	30.1	-53.5201	16.6122
			19	33	29	46	7	-1.2	0.7	-5.9	0.6	-58.8124	0.33114
			16	25	29	17	8.9	3.1	0.7	8.2	20.9	-55.1705	11.5347
			22	41	4	42	4.8	-3.7	16.1	-3.8	13.4	-56.516	7.39546
			50	39	33	29	-12.3	-3.1	-1.2	0.7	-15.9	-61.7725	-8.77521
			38	22	39	29	-2.6	4.8	-3.1	0.7	-0.2	-58.9559	-0.11038
			31	28	47	8	-0.5	1	-6.5	13.8	7.8	-57.5207	4.30482
			9	36	19	6	13.4	-2	7	14.7	33.1	-52.9819	18.2679
			11	13	35	15	11.7	10	-1.8	9.3	29.2	-53.6815	16.1155
			20	12	6	5	6.4	10.9	14.7	15.4	47.4	-50.4164	26.1601
			24	23	31	7	3.6	4.1	-0.5	14.2	21.4	-55.0808	11.8107
			28	34	15	22	1	-1.4	9.3	4.8	13.7	-56.4622	7.56103
			13	26	36	3	10	2.5	-2	16.8	27.3	-54.0224	15.0669
			39	40	1	20	-3.1	-3.3	19.1	6.4	19.1	-55.4935	10.5413
			32	44	17	15	-0.9	-4.8	8.2	9.3	11.8	-56.8031	6.51242
			44	26	43	41	-4.8	2.5	-4	-3.7	-10	-60.714	-5.519
			2	20	42	27	18	6.4	-3.8	1.5	22.1	-54.9553	12.197
			46	11	25	49	-5.9	11.7	3.1	-11.2	-2.3	-59.3326	-1.26937
			14	16	42	9	9.7	8.9	-3.8	13.4	28.2	-53.8609	15.5636
			19	31	47	22	7	-0.5	-6.5	4.8	4.8	-58.0589	2.64912
			35	50	37	49	-1.8	-12.3	-2.4	-11.2	-27.7	-63.8894	-15.2876
			14	33	9	24	9.7	-1.2	13.4	3.6	25.5	-54.3453	14.0734
			12	36	34	41	10.9	-2	-1.4	-3.7	3.8	-58.2383	2.09722
			42	32	3	24	-3.8	-0.9	16.8	3.6	15.7	-56.1034	8.66483
			29	36	2	18	0.7	-2	18	7.6	24.3	-54.5606	13.4112
			34	11	31	30	-1.4	11.7	-0.5	0.2	10	-57.126	5.519
			24	30	11	25	3.6	0.2	11.7	3.1	18.6	-55.5832	10.2653
			36	8	37	16	-2	13.8	-2.4	8.9	18.3	-55.637	10.0998
			4	9	19	12	16.1	13.4	7	10.9	47.4	-50.4164	26.1601
			10	36	16	14	12.2	-2	8.9	9.7	28.8	-53.7533	15.8947
			31	17	4	43	-0.5	8.2	16.1	-4	19.8	-55.3679	10.9276
			29	31	28	20	0.7	-0.5	1	6.4	7.6	-57.5566	4.19444
			43	7	13	20	-4	14.2	10	6.4	26.6	-54.148	14.6805
			42	12	17	25	-3.8	10.9	8.2	3.1	18.4	-55.619	10.155
			23	8	34	48	4.1	13.8	-1.4	-9	7.5	-57.5745	4.13925
			42	47	35	17	-3.8	-6.5	-1.8	8.2	-3.9	-59.6197	-2.15241
			3	36	17	18	16.8	-2	8.2	7.6	30.6	-53.4304	16.8881
			28	35	11	8	1	-1.8	11.7	13.8	24.7	-54.4888	13.6319
			1	46	11	46	19.1	-5.9	11.7	-5.9	19	-55.5114	10.4861
			22	4	43	7	4.8	16.1	-4	14.2	31.1	-53.3407	17.1641
			43	34	19	46	-4	-1.4	7	-5.9	-4.3	-59.6914	-2.37317
			39	41	38	11	-3.1	-3.7	-2.6	11.7	2.3	-58.5074	1.26937
			39	39	42	31	-3.1	-3.1	-3.8	-0.5	-10.5	-60.8037	-5.79495
			43	3	43	10	-4	16.8	-4	12.2	21	-55.1526	11.5899
			15	48	45	37	9.3	-9	-5	-2.4	-7.1	-60.1937	-3.91849
			29	12	34	48	0.7	10.9	-1.4	-9	1.2	-58.7047	0.66228
			19	3	28	29	7	16.8	1	0.7	25.5	-54.3453	14.0734
			6	29	40	50	14.7	0.7	-3.3	-12.3	-0.2	-58.9559	-0.11038
			1	44	39	29	19.1	-4.8	-3.1	0.7	11.9	-56.7851	6.56761
			38	28	32	29	-2.6	1	-0.9	0.7	-1.8	-59.2429	-0.99342
			1	23	2	36	19.1	4.1	18	-2	39.2	-51.8875	21.6345
			2	50	37	24	18	-12.3	-2.4	3.6	6.9	-57.6821	3.80811
			6	33	48	9	14.7	-1.2	-9	13.4	17.9	-55.7087	9.87901
			47	50	35	2	-6.5	-12.3	-1.8	18	-2.6	-59.3864	-1.43494
			33	29	34	43	-1.2	0.7	-1.4	-4	-5.9	-59.9785	-3.25621
			22	50	17	3	4.8	-12.3	8.2	16.8	17.5	-55.7805	9.65825
			4	46	46	23	16.1	-5.9	-5.9	4.1	8.4	-57.413	4.63596
			30	38	10	8	0.2	-2.6	12.2	13.8	23.6	-54.6862	13.0248
			6	46	32	43	14.7	-5.9	-0.9	-4	3.9	-58.2203	2.15241
			38	31	32	39	-2.6	-0.5	-0.9	-3.1	-7.1	-60.1937	-3.91849
			8	19	8	49	13.8	7	13.8	-11.2	23.4	-54.722	12.9145
			5	25	20	46	15.4	3.1	6.4	-5.9	19	-55.5114	10.4861
			47	2	1	38	-6.5	18	19.1	-2.6	28	-53.8968	15.4532
			1	3	11	14	19.1	16.8	11.7	9.7	57.3	-48.6404	31.6239
			34	27	50	39	-1.4	1.5	-12.3	-3.1	-15.3	-61.6648	-8.44407
			23	18	22	27	4.1	7.6	4.8	1.5	18	-55.6908	9.9342
			22	9	3	1	4.8	13.4	16.8	19.1	54.1	-49.2145	29.8578
			19	18	37	41	7	7.6	-2.4	-3.7	8.5	-57.3951	4.69115
			27	37	5	47	1.5	-2.4	15.4	-6.5	8	-57.4848	4.4152
			41	37	41	47	-3.7	-2.4	-3.7	-6.5	-16.3	-61.8442	-8.99597
			1	43	50	25	19.1	-4	-12.3	3.1	5.9	-57.8615	3.25621
			3	32	40	27	16.8	-0.9	-3.3	1.5	14.1	-56.3905	7.78179
			38	39	11	20	-2.6	-3.1	11.7	6.4	12.4	-56.6954	6.84356
			38	46	13	9	-2.6	-5.9	10	13.4	14.9	-56.2469	8.22331
			35	45	15	28	-1.8	-5	9.3	1	3.5	-58.2921	1.93165
			42	27	9	13	-3.8	1.5	13.4	10	21.1	-55.1347	11.6451
			15	4	21	45	9.3	16.1	5.7	-5	26.1	-54.2377	14.4046
			14	8	15	35	9.7	13.8	9.3	-1.8	31	-53.3586	17.1089
			37	23	27	9	-2.4	4.1	1.5	13.4	16.6	-55.942	9.16154
			24	22	31	3	3.6	4.8	-0.5	16.8	24.7	-54.4888	13.6319
			11	9	25	10	11.7	13.4	3.1	12.2	40.4	-51.6722	22.2968
			21	42	34	34	5.7	-3.8	-1.4	-1.4	-0.9	-59.0815	-0.49671
			21	3	25	20	5.7	16.8	3.1	6.4	32	-53.1792	17.6608
			28	34	49	4	1	-1.4	-11.2	16.1	4.5	-58.1127	2.48355
			8	31	5	18	13.8	-0.5	15.4	7.6	36.3	-52.4078	20.034
			26	8	21	14	2.5	13.8	5.7	9.7	31.7	-53.233	17.4952
			44	33	39	30	-4.8	-1.2	-3.1	0.2	-8.9	-60.5167	-4.91191
			7	16	5	40	14.2	8.9	15.4	-3.3	35.2	-52.6051	19.4269
			35	16	44	15	-1.8	8.9	-4.8	9.3	11.6	-56.839	6.40204
			36	35	35	34	-2	-1.8	-1.8	-1.4	-7	-60.1758	-3.8633
			40	10	38	12	-3.3	12.2	-2.6	10.9	17.2	-55.8343	9.49268
			6	21	29	26	14.7	5.7	0.7	2.5	23.6	-54.6862	13.0248
			3	32	18	8	16.8	-0.9	7.6	13.8	37.3	-52.2284	20.5859
			19	31	29	14	7	-0.5	0.7	9.7	16.9	-55.8881	9.32711
			19	50	8	50	7	-12.3	13.8	-12.3	-3.8	-59.6017	-2.09722
			24	21	24	29	3.6	5.7	3.6	0.7	13.6	-56.4802	7.50584
			27	47	6	2	1.5	-6.5	14.7	18	27.7	-53.9506	15.2876
			14	42	32	35	9.7	-3.8	-0.9	-1.8	3.2	-58.3459	1.76608
			27	47	32	27	1.5	-6.5	-0.9	1.5	-4.4	-59.7094	-2.42836
			47	15	18	18	-6.5	9.3	7.6	7.6	18	-55.6908	9.9342
			24	45	46	33	3.6	-5	-5.9	-1.2	-8.5	-60.4449	-4.69115
			44	39	32	10	-4.8	-3.1	-0.9	12.2	3.4	-58.31	1.87646
			46	4	4	5	-5.9	16.1	16.1	15.4	41.7	-51.439	23.0142
			12	49	14	47	10.9	-11.2	9.7	-6.5	2.9	-58.3997	1.60051
			20	19	6	32	6.4	7	14.7	-0.9	27.2	-54.0403	15.0117
			37	26	32	27	-2.4	2.5	-0.9	1.5	0.7	-58.7944	0.38633
			22	22	38	24	4.8	4.8	-2.6	3.6	10.6	-57.0184	5.85014
			4	38	22	6	16.1	-2.6	4.8	14.7	33	-52.9998	18.2127
			10	13	6	8	12.2	10	14.7	13.8	50.7	-49.8244	27.9813
			39	39	44	12	-3.1	-3.1	-4.8	10.9	-0.1	-58.9379	-0.05519
			27	2	48	43	1.5	18	-9	-4	6.5	-57.7539	3.58735
			50	33	34	25	-12.3	-1.2	-1.4	3.1	-11.8	-61.0369	-6.51242
			24	5	26	20	3.6	15.4	2.5	6.4	27.9	-53.9147	15.398
			14	29	50	11	9.7	0.7	-12.3	11.7	9.8	-57.1619	5.40862
			26	48	25	6	2.5	-9	3.1	14.7	11.3	-56.8928	6.23647
			20	20	32	48	6.4	6.4	-0.9	-9	2.9	-58.3997	1.60051
			26	31	50	30	2.5	-0.5	-12.3	0.2	-10.1	-60.7319	-5.57419
			48	27	46	33	-9	1.5	-5.9	-1.2	-14.6	-61.5392	-8.05774
			22	1	32	15	4.8	19.1	-0.9	9.3	32.3	-53.1254	17.8264
			44	6	39	41	-4.8	14.7	-3.1	-3.7	3.1	-58.3639	1.71089
			11	48	37	43	11.7	-9	-2.4	-4	-3.7	-59.5838	-2.04203
			24	7	50	44	3.6	14.2	-12.3	-4.8	0.7	-58.7944	0.38633
			28	7	43	25	1	14.2	-4	3.1	14.3	-56.3546	7.89217
			27	15	11	2	1.5	9.3	11.7	18	40.5	-51.6543	22.3519
			29	42	3	31	0.7	-3.8	16.8	-0.5	13.2	-56.5519	7.28508
			32	35	13	26	-0.9	-1.8	10	2.5	9.8	-57.1619	5.40862
			22	21	7	29	4.8	5.7	14.2	0.7	25.4	-54.3632	14.0183
			33	26	30	1	-1.2	2.5	0.2	19.1	20.6	-55.2244	11.3691
			33	16	46	48	-1.2	8.9	-5.9	-9	-7.2	-60.2117	-3.97368
			1	19	26	1	19.1	7	2.5	19.1	47.7	-50.3626	26.3256
			1	11	33	7	19.1	11.7	-1.2	14.2	43.8	-51.0623	24.1732
			40	3	25	43	-3.3	16.8	3.1	-4	12.6	-56.6596	6.95394
			28	29	23	31	1	0.7	4.1	-0.5	5.3	-57.9692	2.92507
			38	49	26	49	-2.6	-11.2	2.5	-11.2	-22.5	-62.9565	-12.4177
			15	33	18	28	9.3	-1.2	7.6	1	16.7	-55.924	9.21673
			1	40	27	50	19.1	-3.3	1.5	-12.3	5	-58.023	2.7595
			28	28	10	32	1	1	12.2	-0.9	13.3	-56.534	7.34027
			37	28	11	41	-2.4	1	11.7	-3.7	6.6	-57.736	3.64254
			34	43	49	15	-1.4	-4	-11.2	9.3	-7.3	-60.2296	-4.02887
			6	45	2	32	14.7	-5	18	-0.9	26.8	-54.1121	14.7909
			46	16	18	11	-5.9	8.9	7.6	11.7	22.3	-54.9194	12.3074
			2	9	48	13	18	13.4	-9	10	32.4	-53.1074	17.8816
			46	36	2	42	-5.9	-2	18	-3.8	6.3	-57.7898	3.47697
			28	34	38	31	1	-1.4	-2.6	-0.5	-3.5	-59.5479	-1.93165
			34	20	42	36	-1.4	6.4	-3.8	-2	-0.8	-59.0635	-0.44152
			18	25	7	43	7.6	3.1	14.2	-4	20.9	-55.1705	11.5347
			9	7	26	12	13.4	14.2	2.5	10.9	41	-51.5646	22.6279
			17	42	45	29	8.2	-3.8	-5	0.7	0.1	-58.9021	0.05519
			23	32	38	25	4.1	-0.9	-2.6	3.1	3.7	-58.2562	2.04203
			39	47	50	36	-3.1	-6.5	-12.3	-2	-23.9	-63.2077	-13.1904
			24	34	19	15	3.6	-1.4	7	9.3	18.5	-55.6011	10.2101
			11	33	13	47	11.7	-1.2	10	-6.5	14	-56.4084	7.7266
			46	8	40	43	-5.9	13.8	-3.3	-4	0.6	-58.8124	0.33114
			33	9	25	49	-1.2	13.4	3.1	-11.2	4.1	-58.1845	2.26279
			3	4	13	32	16.8	16.1	10	-0.9	42	-51.3852	23.1798
			38	17	4	19	-2.6	8.2	16.1	7	28.7	-53.7712	15.8395
			48	1	43	38	-9	19.1	-4	-2.6	3.5	-58.2921	1.93165
			29	28	10	10	0.7	1	12.2	12.2	26.1	-54.2377	14.4046
			18	14	30	3	7.6	9.7	0.2	16.8	34.3	-52.7666	18.9302
			27	43	4	26	1.5	-4	16.1	2.5	16.1	-56.0317	8.88559
			40	14	31	40	-3.3	9.7	-0.5	-3.3	2.6	-58.4536	1.43494
			5	39	42	20	15.4	-3.1	-3.8	6.4	14.9	-56.2469	8.22331
			17	19	11	41	8.2	7	11.7	-3.7	23.2	-54.7579	12.8041
			3	32	23	37	16.8	-0.9	4.1	-2.4	17.6	-55.7626	9.71344
			24	23	16	47	3.6	4.1	8.9	-6.5	10.1	-57.1081	5.57419
			50	37	34	15	-12.3	-2.4	-1.4	9.3	-6.8	-60.1399	-3.75292
			50	44	9	28	-12.3	-4.8	13.4	1	-2.7	-59.4044	-1.49013
			16	29	29	43	8.9	0.7	0.7	-4	6.3	-57.7898	3.47697
			43	46	45	19	-4	-5.9	-5	7	-7.9	-60.3373	-4.36001
			5	36	43	5	15.4	-2	-4	15.4	24.8	-54.4709	13.6871
			42	31	29	24	-3.8	-0.5	0.7	3.6	0	-58.92	0
			23	31	28	28	4.1	-0.5	1	1	5.6	-57.9154	3.09064
			37	40	19	33	-2.4	-3.3	7	-1.2	0.1	-58.9021	0.05519
			42	34	27	46	-3.8	-1.4	1.5	-5.9	-9.6	-60.6422	-5.29824
			28	9	2	24	1	13.4	18	3.6	36	-52.4616	19.8684
			13	33	37	36	10	-1.2	-2.4	-2	4.4	-58.1306	2.42836
			6	42	1	11	14.7	-3.8	19.1	11.7	41.7	-51.439	23.0142
			21	17	27	1	5.7	8.2	1.5	19.1	34.5	-52.7307	19.0405
			28	1	46	31	1	19.1	-5.9	-0.5	13.7	-56.4622	7.56103
			41	50	5	9	-3.7	-12.3	15.4	13.4	12.8	-56.6237	7.06432
			15	29	33	29	9.3	0.7	-1.2	0.7	9.5	-57.2157	5.24305
			24	45	12	19	3.6	-5	10.9	7	16.5	-55.9599	9.10635
			9	7	36	45	13.4	14.2	-2	-5	20.6	-55.2244	11.3691
			36	12	37	44	-2	10.9	-2.4	-4.8	1.7	-58.615	0.93823
			37	36	4	7	-2.4	-2	16.1	14.2	25.9	-54.2735	14.2942
			12	9	21	27	10.9	13.4	5.7	1.5	31.5	-53.2689	17.3848
			41	15	28	31	-3.7	9.3	1	-0.5	6.1	-57.8257	3.36659
			37	3	38	35	-2.4	16.8	-2.6	-1.8	10	-57.126	5.519
			7	33	48	6	14.2	-1.2	-9	14.7	18.7	-55.5652	10.3205
			38	10	29	21	-2.6	12.2	0.7	5.7	16	-56.0496	8.8304
			45	40	42	39	-5	-3.3	-3.8	-3.1	-15.2	-61.6469	-8.38888
			35	42	7	37	-1.8	-3.8	14.2	-2.4	6.2	-57.8077	3.42178
			49	9	27	40	-11.2	13.4	1.5	-3.3	0.4	-58.8482	0.22076
			7	15	41	26	14.2	9.3	-3.7	2.5	22.3	-54.9194	12.3074
			26	10	42	16	2.5	12.2	-3.8	8.9	19.8	-55.3679	10.9276
			36	33	26	22	-2	-1.2	2.5	4.8	4.1	-58.1845	2.26279
			49	42	31	13	-11.2	-3.8	-0.5	10	-5.5	-59.9067	-3.03545
			3	27	19	34	16.8	1.5	7	-1.4	23.9	-54.6323	13.1904
			21	12	39	13	5.7	10.9	-3.1	10	23.5	-54.7041	12.9696
			44	12	5	44	-4.8	10.9	15.4	-4.8	16.7	-55.924	9.21673
			6	29	19	14	14.7	0.7	7	9.7	32.1	-53.1613	17.716
			6	22	38	24	14.7	4.8	-2.6	3.6	20.5	-55.2423	11.3139
			32	9	46	7	-0.9	13.4	-5.9	14.2	20.8	-55.1885	11.4795
			34	9	44	11	-1.4	13.4	-4.8	11.7	18.9	-55.5293	10.4309
			23	22	36	49	4.1	4.8	-2	-11.2	-4.3	-59.6914	-2.37317
			2	28	22	50	18	1	4.8	-12.3	11.5	-56.8569	6.34685
			43	26	21	50	-4	2.5	5.7	-12.3	-8.1	-60.3731	-4.47039
			36	27	8	33	-2	1.5	13.8	-1.2	12.1	-56.7493	6.67799
			22	9	12	33	4.8	13.4	10.9	-1.2	27.9	-53.9147	15.398
			39	20	47	16	-3.1	6.4	-6.5	8.9	5.7	-57.8974	3.14583
			48	24	26	18	-9	3.6	2.5	7.6	4.7	-58.0768	2.59393
			2	30	12	15	18	0.2	10.9	9.3	38.4	-52.031	21.193
			4	35	45	50	16.1	-1.8	-5	-12.3	-3	-59.4582	-1.6557
			18	34	45	8	7.6	-1.4	-5	13.8	15	-56.229	8.2785
			12	31	10	48	10.9	-0.5	12.2	-9	13.6	-56.4802	7.50584
			23	34	2	12	4.1	-1.4	18	10.9	31.6	-53.251	17.44
			29	37	16	33	0.7	-2.4	8.9	-1.2	6	-57.8436	3.3114
			39	31	28	21	-3.1	-0.5	1	5.7	3.1	-58.3639	1.71089
			2	41	9	26	18	-3.7	13.4	2.5	30.2	-53.5021	16.6674
			1	17	19	15	19.1	8.2	7	9.3	43.6	-51.0982	24.0628
			15	35	49	40	9.3	-1.8	-11.2	-3.3	-7	-60.1758	-3.8633
			35	13	43	46	-1.8	10	-4	-5.9	-1.7	-59.225	-0.93823
			7	43	48	46	14.2	-4	-9	-5.9	-4.7	-59.7632	-2.59393
			12	38	18	28	10.9	-2.6	7.6	1	16.9	-55.8881	9.32711
			16	4	37	32	8.9	16.1	-2.4	-0.9	21.7	-55.027	11.9762
			11	21	8	29	11.7	5.7	13.8	0.7	31.9	-53.1971	17.6056
			43	20	1	27	-4	6.4	19.1	1.5	23	-54.7938	12.6937
			1	39	9	44	19.1	-3.1	13.4	-4.8	24.6	-54.5068	13.5767
			37	40	50	28	-2.4	-3.3	-12.3	1	-17	-61.9698	-9.3823
			43	43	7	26	-4	-4	14.2	2.5	8.7	-57.3592	4.80153
			50	15	7	8	-12.3	9.3	14.2	13.8	25	-54.435	13.7975
			8	44	28	28	13.8	-4.8	1	1	11	-56.9466	6.0709
			10	28	15	44	12.2	1	9.3	-4.8	17.7	-55.7446	9.76863
			30	3	4	23	0.2	16.8	16.1	4.1	37.2	-52.2463	20.5307
			41	37	50	27	-3.7	-2.4	-12.3	1.5	-16.9	-61.9519	-9.32711
			43	38	38	45	-4	-2.6	-2.6	-5	-14.2	-61.4675	-7.83698
			32	12	38	42	-0.9	10.9	-2.6	-3.8	3.6	-58.2742	1.98684
			39	49	45	25	-3.1	-11.2	-5	3.1	-16.2	-61.8263	-8.94078
			24	7	48	17	3.6	14.2	-9	8.2	17	-55.8702	9.3823
			49	14	8	49	-11.2	9.7	13.8	-11.2	1.1	-58.7227	0.60709
			29	19	45	29	0.7	7	-5	0.7	3.4	-58.31	1.87646
			29	38	19	23	0.7	-2.6	7	4.1	9.2	-57.2695	5.07748
			35	19	39	18	-1.8	7	-3.1	7.6	9.7	-57.1798	5.35343
			20	6	24	26	6.4	14.7	3.6	2.5	27.2	-54.0403	15.0117
			19	25	33	9	7	3.1	-1.2	13.4	22.3	-54.9194	12.3074
			28	25	43	30	1	3.1	-4	0.2	0.3	-58.8662	0.16557
			41	45	46	46	-3.7	-5	-5.9	-5.9	-20.5	-62.5977	-11.3139
			19	14	4	5	7	9.7	16.1	15.4	48.2	-50.2729	26.6016
			1	41	20	35	19.1	-3.7	6.4	-1.8	20	-55.332	11.038
			26	8	49	40	2.5	13.8	-11.2	-3.3	1.8	-58.5971	0.99342
			44	7	33	20	-4.8	14.2	-1.2	6.4	14.6	-56.3008	8.05774
			11	5	6	20	11.7	15.4	14.7	6.4	48.2	-50.2729	26.6016
			3	34	48	35	16.8	-1.4	-9	-1.8	4.6	-58.0948	2.53874
			40	20	40	26	-3.3	6.4	-3.3	2.5	2.3	-58.5074	1.26937
			18	14	36	24	7.6	9.7	-2	3.6	18.9	-55.5293	10.4309
			38	49	15	19	-2.6	-11.2	9.3	7	2.5	-58.4715	1.37975
			29	48	4	32	0.7	-9	16.1	-0.9	6.9	-57.6821	3.80811
			21	9	45	32	5.7	13.4	-5	-0.9	13.2	-56.5519	7.28508
			21	48	27	3	5.7	-9	1.5	16.8	15	-56.229	8.2785
			39	4	13	9	-3.1	16.1	10	13.4	36.4	-52.3898	20.0892
			46	35	29	43	-5.9	-1.8	0.7	-4	-11	-60.8934	-6.0709
			17	12	26	25	8.2	10.9	2.5	3.1	24.7	-54.4888	13.6319
			45	48	10	11	-5	-9	12.2	11.7	9.9	-57.1439	5.46381
			18	50	36	39	7.6	-12.3	-2	-3.1	-9.8	-60.6781	-5.40862
			29	46	12	10	0.7	-5.9	10.9	12.2	17.9	-55.7087	9.87901
			44	43	17	40	-4.8	-4	8.2	-3.3	-3.9	-59.6197	-2.15241
			20	25	26	45	6.4	3.1	2.5	-5	7	-57.6642	3.8633
			26	13	38	31	2.5	10	-2.6	-0.5	9.4	-57.2336	5.18786
			35	27	14	22	-1.8	1.5	9.7	4.8	14.2	-56.3725	7.83698
			31	18	8	23	-0.5	7.6	13.8	4.1	25	-54.435	13.7975
			6	45	31	3	14.7	-5	-0.5	16.8	26	-54.2556	14.3494
			6	9	42	36	14.7	13.4	-3.8	-2	22.3	-54.9194	12.3074
			39	26	20	15	-3.1	2.5	6.4	9.3	15.1	-56.2111	8.33369
			20	7	24	10	6.4	14.2	3.6	12.2	36.4	-52.3898	20.0892
			38	46	38	42	-2.6	-5.9	-2.6	-3.8	-14.9	-61.5931	-8.22331
			17	12	41	34	8.2	10.9	-3.7	-1.4	14	-56.4084	7.7266
			29	11	27	10	0.7	11.7	1.5	12.2	26.1	-54.2377	14.4046
			1	12	9	18	19.1	10.9	13.4	7.6	51	-49.7706	28.1469
			46	7	45	43	-5.9	14.2	-5	-4	-0.7	-59.0456	-0.38633
			32	5	48	18	-0.9	15.4	-9	7.6	13.1	-56.5699	7.22989
			33	17	22	46	-1.2	8.2	4.8	-5.9	5.9	-57.8615	3.25621
			43	12	20	27	-4	10.9	6.4	1.5	14.8	-56.2649	8.16812
			5	13	8	42	15.4	10	13.8	-3.8	35.4	-52.5692	19.5373
			1	49	39	12	19.1	-11.2	-3.1	10.9	15.7	-56.1034	8.66483
			32	6	47	32	-0.9	14.7	-6.5	-0.9	6.4	-57.7718	3.53216
			3	17	47	2	16.8	8.2	-6.5	18	36.5	-52.3719	20.1443
			41	41	1	14	-3.7	-3.7	19.1	9.7	21.4	-55.0808	11.8107
			25	49	44	47	3.1	-11.2	-4.8	-6.5	-19.4	-62.4004	-10.7069
			26	27	22	6	2.5	1.5	4.8	14.7	23.5	-54.7041	12.9696
			16	45	7	24	8.9	-5	14.2	3.6	21.7	-55.027	11.9762
			4	36	45	8	16.1	-2	-5	13.8	22.9	-54.8117	12.6385
			44	37	12	8	-4.8	-2.4	10.9	13.8	17.5	-55.7805	9.65825
			7	22	46	7	14.2	4.8	-5.9	14.2	27.3	-54.0224	15.0669
			38	17	1	18	-2.6	8.2	19.1	7.6	32.3	-53.1254	17.8264
			37	25	29	22	-2.4	3.1	0.7	4.8	6.2	-57.8077	3.42178
			35	34	32	11	-1.8	-1.4	-0.9	11.7	7.6	-57.5566	4.19444
			31	32	25	25	-0.5	-0.9	3.1	3.1	4.8	-58.0589	2.64912
			5	20	46	19	15.4	6.4	-5.9	7	22.9	-54.8117	12.6385
			43	34	46	36	-4	-1.4	-5.9	-2	-13.3	-61.306	-7.34027
			49	27	16	7	-11.2	1.5	8.9	14.2	13.4	-56.516	7.39546
			46	15	18	41	-5.9	9.3	7.6	-3.7	7.3	-57.6104	4.02887
			11	17	6	13	11.7	8.2	14.7	10	44.6	-50.9188	24.6147
			43	6	6	30	-4	14.7	14.7	0.2	25.6	-54.3274	14.1286
			28	49	26	41	1	-11.2	2.5	-3.7	-11.4	-60.9652	-6.29166
			41	15	43	45	-3.7	9.3	-4	-5	-3.4	-59.53	-1.87646
			11	4	4	35	11.7	16.1	16.1	-1.8	42.1	-51.3673	23.235
			19	13	48	1	7	10	-9	19.1	27.1	-54.0583	14.9565
			26	50	16	32	2.5	-12.3	8.9	-0.9	-1.8	-59.2429	-0.99342
			29	9	35	4	0.7	13.4	-1.8	16.1	28.4	-53.825	15.674
			11	3	1	25	11.7	16.8	19.1	3.1	50.7	-49.8244	27.9813
			5	41	38	9	15.4	-3.7	-2.6	13.4	22.5	-54.8835	12.4177
			46	45	22	40	-5.9	-5	4.8	-3.3	-9.4	-60.6064	-5.18786
			10	14	24	35	12.2	9.7	3.6	-1.8	23.7	-54.6682	13.08
			26	24	46	42	2.5	3.6	-5.9	-3.8	-3.6	-59.5658	-1.98684
			3	41	40	23	16.8	-3.7	-3.3	4.1	13.9	-56.4263	7.67141
			34	21	26	40	-1.4	5.7	2.5	-3.3	3.5	-58.2921	1.93165
			4	24	4	2	16.1	3.6	16.1	18	53.8	-49.2683	29.6922
			3	26	29	5	16.8	2.5	0.7	15.4	35.4	-52.5692	19.5373
			1	41	22	13	19.1	-3.7	4.8	10	30.2	-53.5021	16.6674
			47	9	34	40	-6.5	13.4	-1.4	-3.3	2.2	-58.5253	1.21418
			16	34	33	26	8.9	-1.4	-1.2	2.5	8.8	-57.3413	4.85672
			7	21	15	3	14.2	5.7	9.3	16.8	46	-50.6676	25.3874
			35	36	10	12	-1.8	-2	12.2	10.9	19.3	-55.4576	10.6517
			10	27	24	26	12.2	1.5	3.6	2.5	19.8	-55.3679	10.9276
			37	42	33	35	-2.4	-3.8	-1.2	-1.8	-9.2	-60.5705	-5.07748
			42	47	15	30	-3.8	-6.5	9.3	0.2	-0.8	-59.0635	-0.44152
			35	38	44	26	-1.8	-2.6	-4.8	2.5	-6.7	-60.122	-3.69773
			17	48	25	22	8.2	-9	3.1	4.8	7.1	-57.6463	3.91849
			49	29	18	24	-11.2	0.7	7.6	3.6	0.7	-58.7944	0.38633
			42	49	26	33	-3.8	-11.2	2.5	-1.2	-13.7	-61.3778	-7.56103
			19	24	21	5	7	3.6	5.7	15.4	31.7	-53.233	17.4952
			29	7	45	6	0.7	14.2	-5	14.7	24.6	-54.5068	13.5767
			16	2	8	12	8.9	18	13.8	10.9	51.6	-49.663	28.478
			49	6	3	22	-11.2	14.7	16.8	4.8	25.1	-54.4171	13.8527
			22	18	25	4	4.8	7.6	3.1	16.1	31.6	-53.251	17.44
			25	39	9	12	3.1	-3.1	13.4	10.9	24.3	-54.5606	13.4112
			24	5	18	18	3.6	15.4	7.6	7.6	34.2	-52.7845	18.875
			14	2	29	42	9.7	18	0.7	-3.8	24.6	-54.5068	13.5767
			10	33	31	16	12.2	-1.2	-0.5	8.9	19.4	-55.4396	10.7069
			19	26	7	32	7	2.5	14.2	-0.9	22.8	-54.8297	12.5833
			18	36	37	39	7.6	-2	-2.4	-3.1	0.1	-58.9021	0.05519
			41	33	18	11	-3.7	-1.2	7.6	11.7	14.4	-56.3366	7.94736
			30	24	18	7	0.2	3.6	7.6	14.2	25.6	-54.3274	14.1286
			42	28	19	41	-3.8	1	7	-3.7	0.5	-58.8303	0.27595
			40	2	35	8	-3.3	18	-1.8	13.8	26.7	-54.13	14.7357
			1	47	27	46	19.1	-6.5	1.5	-5.9	8.2	-57.4489	4.52558
			43	24	40	22	-4	3.6	-3.3	4.8	1.1	-58.7227	0.60709
			35	21	6	49	-1.8	5.7	14.7	-11.2	7.4	-57.5924	4.08406
			33	23	10	27	-1.2	4.1	12.2	1.5	16.6	-55.942	9.16154
			32	43	34	48	-0.9	-4	-1.4	-9	-15.3	-61.6648	-8.44407
			35	40	46	19	-1.8	-3.3	-5.9	7	-4	-59.6376	-2.2076
			44	14	35	1	-4.8	9.7	-1.8	19.1	22.2	-54.9373	12.2522
			33	3	17	48	-1.2	16.8	8.2	-9	14.8	-56.2649	8.16812
			7	35	24	12	14.2	-1.8	3.6	10.9	26.9	-54.0941	14.8461
			46	34	50	4	-5.9	-1.4	-12.3	16.1	-3.5	-59.5479	-1.93165
			24	35	24	22	3.6	-1.8	3.6	4.8	10.2	-57.0901	5.62938
			1	38	42	24	19.1	-2.6	-3.8	3.6	16.3	-55.9958	8.99597
			44	37	16	31	-4.8	-2.4	8.9	-0.5	1.2	-58.7047	0.66228
			12	34	45	21	10.9	-1.4	-5	5.7	10.2	-57.0901	5.62938
			3	46	3	15	16.8	-5.9	16.8	9.3	37	-52.2822	20.4203
			8	23	10	22	13.8	4.1	12.2	4.8	34.9	-52.6589	19.2613
			3	5	31	39	16.8	15.4	-0.5	-3.1	28.6	-53.7892	15.7843
			19	6	24	10	7	14.7	3.6	12.2	37.5	-52.1925	20.6962
			17	22	37	27	8.2	4.8	-2.4	1.5	12.1	-56.7493	6.67799
			5	22	33	37	15.4	4.8	-1.2	-2.4	16.6	-55.942	9.16154
			27	49	28	46	1.5	-11.2	1	-5.9	-14.6	-61.5392	-8.05774
			2	29	15	50	18	0.7	9.3	-12.3	15.7	-56.1034	8.66483
			31	43	15	27	-0.5	-4	9.3	1.5	6.3	-57.7898	3.47697
			43	17	43	50	-4	8.2	-4	-12.3	-12.1	-61.0907	-6.67799
			48	40	25	24	-9	-3.3	3.1	3.6	-5.6	-59.9246	-3.09064
			10	5	36	25	12.2	15.4	-2	3.1	28.7	-53.7712	15.8395
			46	37	32	40	-5.9	-2.4	-0.9	-3.3	-12.5	-61.1625	-6.89875
			20	20	14	32	6.4	6.4	9.7	-0.9	21.6	-55.045	11.921
			45	20	14	21	-5	6.4	9.7	5.7	16.8	-55.9061	9.27192
			45	30	43	8	-5	0.2	-4	13.8	5	-58.023	2.7595
			23	36	23	26	4.1	-2	4.1	2.5	8.7	-57.3592	4.80153
			11	5	2	6	11.7	15.4	18	14.7	59.8	-48.1919	33.0036
			35	27	31	44	-1.8	1.5	-0.5	-4.8	-5.6	-59.9246	-3.09064
			26	28	25	36	2.5	1	3.1	-2	4.6	-58.0948	2.53874
			42	40	1	42	-3.8	-3.3	19.1	-3.8	8.2	-57.4489	4.52558
			50	7	9	21	-12.3	14.2	13.4	5.7	21	-55.1526	11.5899
			50	26	45	15	-12.3	2.5	-5	9.3	-5.5	-59.9067	-3.03545
			37	20	6	40	-2.4	6.4	14.7	-3.3	15.4	-56.1572	8.49926
			45	4	1	10	-5	16.1	19.1	12.2	42.4	-51.3134	23.4006
			1	4	19	28	19.1	16.1	7	1	43.2	-51.1699	23.8421
			28	46	37	32	1	-5.9	-2.4	-0.9	-8.2	-60.3911	-4.52558
			3	39	39	13	16.8	-3.1	-3.1	10	20.6	-55.2244	11.3691
			30	15	45	31	0.2	9.3	-5	-0.5	4	-58.2024	2.2076
			26	26	42	32	2.5	2.5	-3.8	-0.9	0.3	-58.8662	0.16557
			10	15	39	11	12.2	9.3	-3.1	11.7	30.1	-53.5201	16.6122
			40	37	1	23	-3.3	-2.4	19.1	4.1	17.5	-55.7805	9.65825
			20	33	17	48	6.4	-1.2	8.2	-9	4.4	-58.1306	2.42836
			47	5	22	1	-6.5	15.4	4.8	19.1	32.8	-53.0357	18.1023
			35	42	30	44	-1.8	-3.8	0.2	-4.8	-10.2	-60.7499	-5.62938
			33	27	29	34	-1.2	1.5	0.7	-1.4	-0.4	-58.9918	-0.22076
			17	38	29	11	8.2	-2.6	0.7	11.7	18	-55.6908	9.9342
			45	23	33	23	-5	4.1	-1.2	4.1	2	-58.5612	1.1038
			46	19	5	15	-5.9	7	15.4	9.3	25.8	-54.2915	14.239
			30	4	18	26	0.2	16.1	7.6	2.5	26.4	-54.1838	14.5702
			34	27	10	10	-1.4	1.5	12.2	12.2	24.5	-54.5247	13.5215
			21	45	20	22	5.7	-5	6.4	4.8	11.9	-56.7851	6.56761
			41	2	27	12	-3.7	18	1.5	10.9	26.7	-54.13	14.7357
			28	18	7	29	1	7.6	14.2	0.7	23.5	-54.7041	12.9696
			16	34	39	14	8.9	-1.4	-3.1	9.7	14.1	-56.3905	7.78179
			48	11	12	16	-9	11.7	10.9	8.9	22.5	-54.8835	12.4177
			32	27	47	50	-0.9	1.5	-6.5	-12.3	-18.2	-62.1851	-10.0446
			45	14	34	17	-5	9.7	-1.4	8.2	11.5	-56.8569	6.34685
			32	2	38	47	-0.9	18	-2.6	-6.5	8	-57.4848	4.4152
			12	34	22	44	10.9	-1.4	4.8	-4.8	9.5	-57.2157	5.24305
			37	40	6	45	-2.4	-3.3	14.7	-5	4	-58.2024	2.2076
			36	11	19	42	-2	11.7	7	-3.8	12.9	-56.6057	7.11951
			46	15	29	18	-5.9	9.3	0.7	7.6	11.7	-56.821	6.45723
			45	24	33	14	-5	3.6	-1.2	9.7	7.1	-57.6463	3.91849
			25	20	39	16	3.1	6.4	-3.1	8.9	15.3	-56.1752	8.44407
			43	31	22	8	-4	-0.5	4.8	13.8	14.1	-56.3905	7.78179
			8	33	5	26	13.8	-1.2	15.4	2.5	30.5	-53.4483	16.8329
			13	21	1	13	10	5.7	19.1	10	44.8	-50.8829	24.7251
			20	44	43	31	6.4	-4.8	-4	-0.5	-2.9	-59.4403	-1.60051
			14	38	38	33	9.7	-2.6	-2.6	-1.2	3.3	-58.328	1.82127
			30	31	22	20	0.2	-0.5	4.8	6.4	10.9	-56.9645	6.01571
			27	13	1	21	1.5	10	19.1	5.7	36.3	-52.4078	20.034
			26	32	43	12	2.5	-0.9	-4	10.9	8.5	-57.3951	4.69115
			13	6	1	27	10	14.7	19.1	1.5	45.3	-50.7932	25.0011
			23	6	11	42	4.1	14.7	11.7	-3.8	26.7	-54.13	14.7357
			29	23	14	12	0.7	4.1	9.7	10.9	25.4	-54.3632	14.0183
			33	3	38	50	-1.2	16.8	-2.6	-12.3	0.7	-58.7944	0.38633
			28	4	4	29	1	16.1	16.1	0.7	33.9	-52.8383	18.7094
			1	48	38	48	19.1	-9	-2.6	-9	-1.5	-59.1891	-0.82785
			7	32	4	10	14.2	-0.9	16.1	12.2	41.6	-51.457	22.959
			2	17	42	29	18	8.2	-3.8	0.7	23.1	-54.7759	12.7489
			20	1	9	14	6.4	19.1	13.4	9.7	48.6	-50.2012	26.8223
			35	50	42	3	-1.8	-12.3	-3.8	16.8	-1.1	-59.1173	-0.60709
			12	6	24	47	10.9	14.7	3.6	-6.5	22.7	-54.8476	12.5281
			16	27	15	2	8.9	1.5	9.3	18	37.7	-52.1566	20.8066
			4	36	32	46	16.1	-2	-0.9	-5.9	7.3	-57.6104	4.02887
			32	36	31	7	-0.9	-2	-0.5	14.2	10.8	-56.9825	5.96052
			20	40	15	40	6.4	-3.3	9.3	-3.3	9.1	-57.2875	5.02229
			29	8	8	31	0.7	13.8	13.8	-0.5	27.8	-53.9327	15.3428
			8	29	33	22	13.8	0.7	-1.2	4.8	18.1	-55.6729	9.98939
			47	9	24	31	-6.5	13.4	3.6	-0.5	10	-57.126	5.519
			16	3	28	15	8.9	16.8	1	9.3	36	-52.4616	19.8684
			18	49	22	17	7.6	-11.2	4.8	8.2	9.4	-57.2336	5.18786
			6	50	17	26	14.7	-12.3	8.2	2.5	13.1	-56.5699	7.22989
			50	7	22	11	-12.3	14.2	4.8	11.7	18.4	-55.619	10.155
			41	29	30	9	-3.7	0.7	0.2	13.4	10.6	-57.0184	5.85014
			48	41	45	37	-9	-3.7	-5	-2.4	-20.1	-62.5259	-11.0932
			5	18	26	5	15.4	7.6	2.5	15.4	40.9	-51.5825	22.5727
			17	22	3	21	8.2	4.8	16.8	5.7	35.5	-52.5513	19.5924
			42	37	28	25	-3.8	-2.4	1	3.1	-2.1	-59.2967	-1.15899
			3	20	2	7	16.8	6.4	18	14.2	55.4	-48.9812	30.5753
			50	13	41	10	-12.3	10	-3.7	12.2	6.2	-57.8077	3.42178
			14	20	10	33	9.7	6.4	12.2	-1.2	27.1	-54.0583	14.9565
			33	5	45	28	-1.2	15.4	-5	1	10.2	-57.0901	5.62938
			4	42	7	42	16.1	-3.8	14.2	-3.8	22.7	-54.8476	12.5281
			9	49	8	10	13.4	-11.2	13.8	12.2	28.2	-53.8609	15.5636
			21	18	46	11	5.7	7.6	-5.9	11.7	19.1	-55.4935	10.5413
			10	40	30	43	12.2	-3.3	0.2	-4	5.1	-58.0051	2.81469
			25	43	26	9	3.1	-4	2.5	13.4	15	-56.229	8.2785
			49	31	31	25	-11.2	-0.5	-0.5	3.1	-9.1	-60.5525	-5.02229
			11	32	49	30	11.7	-0.9	-11.2	0.2	-0.2	-58.9559	-0.11038
			6	21	44	50	14.7	5.7	-4.8	-12.3	3.3	-58.328	1.82127
			22	19	18	50	4.8	7	7.6	-12.3	7.1	-57.6463	3.91849
			25	14	30	25	3.1	9.7	0.2	3.1	16.1	-56.0317	8.88559
			18	1	48	46	7.6	19.1	-9	-5.9	11.8	-56.8031	6.51242
			42	28	8	19	-3.8	1	13.8	7	18	-55.6908	9.9342
			19	15	31	47	7	9.3	-0.5	-6.5	9.3	-57.2516	5.13267
			39	21	18	4	-3.1	5.7	7.6	16.1	26.3	-54.2018	14.515
			27	40	35	12	1.5	-3.3	-1.8	10.9	7.3	-57.6104	4.02887
			36	31	7	1	-2	-0.5	14.2	19.1	30.8	-53.3945	16.9985
			44	11	25	21	-4.8	11.7	3.1	5.7	15.7	-56.1034	8.66483
			3	38	23	5	16.8	-2.6	4.1	15.4	33.7	-52.8742	18.599
			25	37	38	25	3.1	-2.4	-2.6	3.1	1.2	-58.7047	0.66228
			15	38	9	7	9.3	-2.6	13.4	14.2	34.3	-52.7666	18.9302
			13	28	30	19	10	1	0.2	7	18.2	-55.6549	10.0446
			48	17	38	25	-9	8.2	-2.6	3.1	-0.3	-58.9738	-0.16557
			47	9	13	23	-6.5	13.4	10	4.1	21	-55.1526	11.5899
			38	8	28	10	-2.6	13.8	1	12.2	24.4	-54.5426	13.4664
			42	3	23	3	-3.8	16.8	4.1	16.8	33.9	-52.8383	18.7094
			17	29	1	34	8.2	0.7	19.1	-1.4	26.6	-54.148	14.6805
			37	35	40	1	-2.4	-1.8	-3.3	19.1	11.6	-56.839	6.40204
			22	49	11	40	4.8	-11.2	11.7	-3.3	2	-58.5612	1.1038
[truncated: 3,001 more rows]
